# Supplementary material for: Molecular signatures of differential responses to exercise trainings during rehabilitation
Source: PubMed Central journal article supplement (PMC5568829; doi:10.15761/bgg.1000127), 2017-04-10
Supplement: NIHMS888767-supplement-Table_S1.pdf [file NIHMS888767-supplement-Table_S1.pdf]

**Table S1****pre-rehab vs. control**

| <b>Gene</b> | <b>Affymetrix accession #</b> | <b>Gene description</b>                                                                  |
|-------------|-------------------------------|------------------------------------------------------------------------------------------|
|             |                               | Oxidative Phosphorylation                                                                |
| ATP6V1A     | 201971_s_at                   | ATPase, H+ transporting, lysosomal 70kDa, V1 subunit A                                   |
| ATP6V0C     | 36994_at                      | ATPase, H+ transporting, lysosomal 16kDa, V0 subunit c                                   |
| SDHA        | 201093_x_at                   | succinate dehydrogenase complex, subunit A, flavoprotein (Fp)                            |
| MT-CO2      | 1553570_x_at                  | mitochondrially encoded cytochrome c oxidase II                                          |
| ATP6V0E1    | 200096_s_at                   | ATPase, H+ transporting, lysosomal 9kDa, V0 subunit e1                                   |
| PPA1        | 217848_s_at                   | pyrophosphatase (inorganic) 1                                                            |
| MT-COI      | 1553538_s_at                  | cytochrome c oxidase subunit I, Mitochondrion [Homo sapiens]                             |
| NDUFC1      | 203478_at                     | NADH dehydrogenase (ubiquinone) 1, subcomplex unknown, 1, 6kDa                           |
| NDUFA11     | 225304_s_at                   | NADH dehydrogenase (ubiquinone) 1 alpha subcomplex, 11, 14.7kDa                          |
| ATP5G2      | 208764_s_at                   | ATP synthase, H+ transporting, mitochondrial Fo complex, subunit C2 (subunit 9)          |
| ATP5J2      | 202961_s_at                   | ATP5J2-PTCD1 readthrough                                                                 |
| NDUFB7      | 202839_s_at                   | NADH dehydrogenase (ubiquinone) 1 beta subcomplex, 7, 18kDa                              |
| ATP5A1      | 213738_s_at                   | ATP synthase, H+ transporting, mitochondrial F1 complex, alpha subunit 1, cardiac muscle |
| NDUFS2      | 201966_at                     | NADH dehydrogenase (ubiquinone) Fe-S protein 2, 49kDa (NADH-coenzyme Q reductase)        |
| NDUFB9      | 222992_s_at                   | NADH dehydrogenase (ubiquinone) 1 beta subcomplex, 9, 22kDa                              |
| ATP6V1D     | 208898_at                     | ATPase, H+ transporting, lysosomal 34kDa, V1 subunit D                                   |
| COX7B       | 202110_at                     | cytochrome c oxidase subunit VIIb                                                        |
| NDUFC2      | 218101_s_at                   | NADH dehydrogenase (ubiquinone) 1, subcomplex unknown, 2, 14.5kDa                        |
| UQCRB       | 205849_s_at                   | ubiquinol-cytochrome c reductase binding protein                                         |
| NDUFS4      | 209303_at                     | NADH dehydrogenase (ubiquinone) Fe-S protein 4, 18kDa (NADH-coenzyme Q reductase)        |
| NDUFA12     | 223244_s_at                   | NADH dehydrogenase (ubiquinone) 1 alpha subcomplex, 12                                   |
| ATP5B       | 201322_at                     | ATP synthase, H+ transporting, mitochondrial F1 complex, beta polypeptide                |
| ATP5F1      | 211755_s_at                   | ATP synthase, H+ transporting, mitochondrial Fo complex, subunit B1                      |
| UQCRC1      | 208909_at                     | ubiquinol-cytochrome c reductase, Rieske iron-sulfur polypeptide 1                       |
| NDUFS6      | 203606_at                     | NADH dehydrogenase (ubiquinone) Fe-S protein 6, 13kDa (NADH-coenzyme Q reductase)        |
| COX4I1      | 200086_s_at                   | cytochrome c oxidase subunit IV isoform 1                                                |
| NDUFB4      | 218226_s_at                   | NADH dehydrogenase (ubiquinone) 1 beta subcomplex, 4, 15kDa                              |
| NDUFB8      | 201226_at                     | NADH dehydrogenase (ubiquinone) 1 beta subcomplex, 8, 19kDa                              |
| NDUFB6      | 203613_s_at                   | NADH dehydrogenase (ubiquinone) 1 beta subcomplex, 6, 17kDa                              |
| NDUFA2      | 209224_s_at                   | NADH dehydrogenase (ubiquinone) 1 alpha subcomplex, 2, 8kDa                              |
| COX7C       | 201134_x_at                   | cytochrome c oxidase subunit VIIc                                                        |
| NDUFB1      | 206790_s_at                   | NADH dehydrogenase (ubiquinone) 1 beta subcomplex, 1, 7kDa                               |
| UQCRC2      | 201568_at                     | ubiquinol-cytochrome c reductase, complex III subunit VII, 9.5kDa                        |
| NDUFA13     | 220864_s_at                   | NADH dehydrogenase (ubiquinone) 1 alpha subcomplex, 13                                   |
| UQCRC2      | 200883_at                     | ubiquinol-cytochrome c reductase core protein II                                         |

|                           |              |                                                                                          |
|---------------------------|--------------|------------------------------------------------------------------------------------------|
| NDUFB5                    | 203621_at    | NADH dehydrogenase (ubiquinone) 1 beta subcomplex, 5, 16kDa                              |
| NDUFAB1                   | 202077_at    | NADH dehydrogenase (ubiquinone) 1, alpha/beta subcomplex, 1, 8kDa                        |
| NDUFA9                    | 208969_at    | NADH dehydrogenase (ubiquinone) 1 alpha subcomplex, 9, 39kDa                             |
| ATP5H                     | 210149_s_at  | ATP synthase, H+ transporting, mitochondrial Fo complex, subunit d                       |
| NDUFB2                    | 218200_s_at  | NADH dehydrogenase (ubiquinone) 1 beta subcomplex, 2, 8kDa                               |
| ATP5O                     | 200818_at    | ATP synthase, H+ transporting, mitochondrial F1 complex, O subunit                       |
| COX5A                     | 203663_s_at  | cytochrome c oxidase subunit Va                                                          |
| NDUFA1                    | 202298_at    | NADH dehydrogenase (ubiquinone) 1 alpha subcomplex, 1, 7.5kDa                            |
| NDUFS8                    | 203189_s_at  | NADH dehydrogenase (ubiquinone) Fe-S protein 8, 23kDa (NADH-coenzyme Q reductase)        |
| NDUFA8                    | 218160_at    | NADH dehydrogenase (ubiquinone) 1 alpha subcomplex, 8, 19kDa                             |
| NDUFS7                    | 211752_s_at  | NADH dehydrogenase (ubiquinone) Fe-S protein 7, 20kDa (NADH-coenzyme Q reductase)        |
| SDHB                      | 202675_at    | succinate dehydrogenase complex, subunit B, iron sulfur (Ip)                             |
| COX8A                     | 201119_s_at  | cytochrome c oxidase subunit VIIIA (ubiquitous)                                          |
| COX6B1                    | 201441_at    | cytochrome c oxidase subunit VIb polypeptide 1 (ubiquitous)                              |
| NDUFB11                   | 218320_s_at  | NADH dehydrogenase (ubiquinone) 1 beta subcomplex, 11, 17.3kDa                           |
| NDUFV1                    | 208714_at    | NADH dehydrogenase (ubiquinone) flavoprotein 1, 51kDa                                    |
| ATP5L                     | 207573_x_at  | ATP synthase, H+ transporting, mitochondrial Fo complex, subunit G                       |
| ATP5G3                    | 207507_s_at  | ATP synthase, H+ transporting, mitochondrial Fo complex, subunit C3 (subunit 9)          |
| COX5B                     | 202343_x_at  | cytochrome c oxidase subunit Vb                                                          |
| SDHC                      | 202004_x_at  | succinate dehydrogenase complex, subunit C, integral membrane protein, 15kDa             |
| COX6C                     | 201754_at    | cytochrome c oxidase subunit VIc                                                         |
| NDUFA10                   | 217860_at    | NADH dehydrogenase (ubiquinone) 1 alpha subcomplex, 10, 42kDa                            |
| UQCRH                     | 202233_s_at  | ubiquinol-cytochrome c reductase hinge protein                                           |
| NDUFA3                    | 218563_at    | NADH dehydrogenase (ubiquinone) 1 alpha subcomplex, 3, 9kDa                              |
| NDUFB10                   | 223112_s_at  | NADH dehydrogenase (ubiquinone) 1 beta subcomplex, 10, 22kDa                             |
| NDUFS3                    | 201740_at    | NADH dehydrogenase (ubiquinone) Fe-S protein 3, 30kDa (NADH-coenzyme Q reductase)        |
| UQCR10                    | 218190_s_at  | Homo sapiens ubiquinol-cytochrome c reductase, complex III subunit X                     |
| CYC1                      | 201066_at    | cytochrome c-1                                                                           |
| ATP5G1                    | 208972_s_at  | ATP synthase, H+ transporting, mitochondrial Fo complex, subunit C1 (subunit 9)          |
| COX6A2                    | 206353_at    | cytochrome c oxidase subunit VIa polypeptide 2                                           |
| NDUFB3                    | 203371_s_at  | NADH dehydrogenase (ubiquinone) 1 beta subcomplex, 3, 12kDa                              |
| Mitochondrial Dysfunction |              |                                                                                          |
| PRDX5                     | 222994_at    | peroxiredoxin 5                                                                          |
| SDHA                      | 201093_x_at  | succinate dehydrogenase complex, subunit A, flavoprotein (Fp)                            |
| MT-CO2                    | 1553570_x_at | mitochondrially encoded cytochrome c oxidase II                                          |
| MT-COI                    | 1553538_s_at | cytochrome c oxidase subunit I, Mitochondrion [Homo sapiens]                             |
| PRDX3                     | 201619_at    | peroxiredoxin 3                                                                          |
| NDUFA11                   | 225304_s_at  | NADH dehydrogenase (ubiquinone) 1 alpha subcomplex, 11, 14.7kDa                          |
| NDUFB7                    | 202839_s_at  | NADH dehydrogenase (ubiquinone) 1 beta subcomplex, 7, 18kDa                              |
| ATP5A1                    | 213738_s_at  | ATP synthase, H+ transporting, mitochondrial F1 complex, alpha subunit 1, cardiac muscle |

|         |             |                                                                                       |
|---------|-------------|---------------------------------------------------------------------------------------|
| PARK7   | 200006_at   | Parkinson disease (autosomal recessive, early onset) 7                                |
| RHOT2   | 65770_at    | ras homolog gene family, member T2                                                    |
| NDUFS2  | 201966_at   | NADH dehydrogenase (ubiquinone) Fe-S protein 2, 49kDa (NADH-coenzyme Q reductase)     |
| TXN2    | 209078_s_at | thioredoxin 2                                                                         |
| NDUFB9  | 222992_s_at | NADH dehydrogenase (ubiquinone) 1 beta subcomplex, 9, 22kDa                           |
| COX7B   | 202110_at   | cytochrome c oxidase subunit VIIb                                                     |
| UQCRB   | 205849_s_at | ubiquinol-cytochrome c reductase binding protein                                      |
| NDUFS4  | 209303_at   | NADH dehydrogenase (ubiquinone) Fe-S protein 4, 18kDa (NADH-coenzyme Q reductase)     |
| NDUFA12 | 223244_s_at | NADH dehydrogenase (ubiquinone) 1 alpha subcomplex, 12                                |
| ATP5B   | 201322_at   | ATP synthase, H <sup>+</sup> transporting, mitochondrial F1 complex, beta polypeptide |
| UQCRCF1 | 208909_at   | ubiquinol-cytochrome c reductase, Rieske iron-sulfur polypeptide 1                    |
| NDUFS6  | 203606_at   | NADH dehydrogenase (ubiquinone) Fe-S protein 6, 13kDa (NADH-coenzyme Q reductase)     |
| COX4I1  | 200086_s_at | cytochrome c oxidase subunit IV isoform 1                                             |
| NDUFB4  | 218226_s_at | NADH dehydrogenase (ubiquinone) 1 beta subcomplex, 4, 15kDa                           |
| NDUFB8  | 201226_at   | NADH dehydrogenase (ubiquinone) 1 beta subcomplex, 8, 19kDa                           |
| NDUFB6  | 203613_s_at | NADH dehydrogenase (ubiquinone) 1 beta subcomplex, 6, 17kDa                           |
| MAOB    | 204041_at   | monoamine oxidase B                                                                   |
| NDUFA2  | 209224_s_at | NADH dehydrogenase (ubiquinone) 1 alpha subcomplex, 2, 8kDa                           |
| COX7C   | 201134_x_at | cytochrome c oxidase subunit VIIc                                                     |
| NDUFB1  | 206790_s_at | NADH dehydrogenase (ubiquinone) 1 beta subcomplex, 1, 7kDa                            |
| NDUFA13 | 220864_s_at | NADH dehydrogenase (ubiquinone) 1 alpha subcomplex, 13                                |
| UQCRC2  | 200883_at   | ubiquinol-cytochrome c reductase core protein II                                      |
| NDUFB5  | 203621_at   | NADH dehydrogenase (ubiquinone) 1 beta subcomplex, 5, 16kDa                           |
| NDUFAB1 | 202077_at   | NADH dehydrogenase (ubiquinone) 1, alpha/beta subcomplex, 1, 8kDa                     |
| NDUFA9  | 208969_at   | NADH dehydrogenase (ubiquinone) 1 alpha subcomplex, 9, 39kDa                          |
| NDUFB2  | 218200_s_at | NADH dehydrogenase (ubiquinone) 1 beta subcomplex, 2, 8kDa                            |
| COX5A   | 203663_s_at | cytochrome c oxidase subunit Va                                                       |
| NDUFS8  | 203189_s_at | NADH dehydrogenase (ubiquinone) Fe-S protein 8, 23kDa (NADH-coenzyme Q reductase)     |
| PDHA1   | 200980_s_at | pyruvate dehydrogenase (lipoamide) alpha 1                                            |
| NDUFA8  | 218160_at   | NADH dehydrogenase (ubiquinone) 1 alpha subcomplex, 8, 19kDa                          |
| NDUFS7  | 211752_s_at | NADH dehydrogenase (ubiquinone) Fe-S protein 7, 20kDa (NADH-coenzyme Q reductase)     |
| SDHB    | 202675_at   | succinate dehydrogenase complex, subunit B, iron sulfur (lp)                          |
| COX8A   | 201119_s_at | cytochrome c oxidase subunit VIIIA (ubiquitous)                                       |
| COX6B1  | 201441_at   | cytochrome c oxidase subunit VIb polypeptide 1 (ubiquitous)                           |
| NDUFB11 | 218320_s_at | NADH dehydrogenase (ubiquinone) 1 beta subcomplex, 11, 17.3kDa                        |
| NDUFV1  | 208714_at   | NADH dehydrogenase (ubiquinone) flavoprotein 1, 51kDa                                 |
| CYCS    | 208905_at   | cytochrome c, somatic                                                                 |
| CPT1B   | 210069_at   | carnitine palmitoyltransferase 1B (muscle)                                            |
| COX5B   | 202343_x_at | cytochrome c oxidase subunit Vb                                                       |
| SDHC    | 202004_x_at | succinate dehydrogenase complex, subunit C, integral membrane protein, 15kDa          |
| COX6C   | 201754_at   | cytochrome c oxidase subunit VIc                                                      |

|         |             |                                                                                   |
|---------|-------------|-----------------------------------------------------------------------------------|
| NDUFA10 | 217860_at   | NADH dehydrogenase (ubiquinone) 1 alpha subcomplex, 10, 42kDa                     |
| UQCRH   | 202233_s_at | ubiquinol-cytochrome c reductase hinge protein                                    |
| NDUFA3  | 218563_at   | NADH dehydrogenase (ubiquinone) 1 alpha subcomplex, 3, 9kDa                       |
| NDUFB10 | 223112_s_at | NADH dehydrogenase (ubiquinone) 1 beta subcomplex, 10, 22kDa                      |
|         |             | NADH dehydrogenase (ubiquinone) Fe-S protein 3, 30kDa (NADH-coenzyme Q reductase) |
| NDUFS3  | 201740_at   |                                                                                   |
| PINK1   | 209018_s_at | PTEN induced putative kinase 1                                                    |
| CYC1    | 201066_at   | cytochrome c-1                                                                    |
| COX6A2  | 206353_at   | cytochrome c oxidase subunit VIa polypeptide 2                                    |
| NDUFB3  | 203371_s_at | NADH dehydrogenase (ubiquinone) 1 beta subcomplex, 3, 12kDa                       |
|         |             |                                                                                   |
|         |             | Ubiquinone Biosynthesis                                                           |
| UFSP2   | 218449_at   | UFM1-specific peptidase 2                                                         |
| NDUFC1  | 203478_at   | NADH dehydrogenase (ubiquinone) 1, subcomplex unknown, 1, 6kDa                    |
|         |             |                                                                                   |
| NDUFA11 | 225304_s_at | NADH dehydrogenase (ubiquinone) 1 alpha subcomplex, 11, 14.7kDa                   |
| NDUFB7  | 202839_s_at | NADH dehydrogenase (ubiquinone) 1 beta subcomplex, 7, 18kDa                       |
|         |             | NADH dehydrogenase (ubiquinone) Fe-S protein 2, 49kDa (NADH-coenzyme Q reductase) |
| NDUFS2  | 201966_at   |                                                                                   |
| NDUFB9  | 222992_s_at | NADH dehydrogenase (ubiquinone) 1 beta subcomplex, 9, 22kDa                       |
| MGMT    | 204880_at   | Homo sapiens O-6-methylguanine-DNA methyltransferase                              |
| NDUFC2  | 218101_s_at | NADH dehydrogenase (ubiquinone) 1, subcomplex unknown, 2, 14.5kDa                 |
|         |             | NADH dehydrogenase (ubiquinone) Fe-S protein 4, 18kDa (NADH-coenzyme Q reductase) |
| NDUFS4  | 209303_at   |                                                                                   |
|         |             |                                                                                   |
| NDUFA12 | 223244_s_at | NADH dehydrogenase (ubiquinone) 1 alpha subcomplex, 12                            |
|         |             | NADH dehydrogenase (ubiquinone) Fe-S protein 6, 13kDa (NADH-coenzyme Q reductase) |
| NDUFS6  | 203606_at   |                                                                                   |
| NDUFB4  | 218226_s_at | NADH dehydrogenase (ubiquinone) 1 beta subcomplex, 4, 15kDa                       |
| NDUFB8  | 201226_at   | NADH dehydrogenase (ubiquinone) 1 beta subcomplex, 8, 19kDa                       |
| NDUFB6  | 203613_s_at | NADH dehydrogenase (ubiquinone) 1 beta subcomplex, 6, 17kDa                       |
| NDUFA2  | 209224_s_at | NADH dehydrogenase (ubiquinone) 1 alpha subcomplex, 2, 8kDa                       |
| NDUFB1  | 206790_s_at | NADH dehydrogenase (ubiquinone) 1 beta subcomplex, 1, 7kDa                        |
|         |             |                                                                                   |
| NDUFA13 | 220864_s_at | NADH dehydrogenase (ubiquinone) 1 alpha subcomplex, 13                            |
| NDUFB5  | 203621_at   | NADH dehydrogenase (ubiquinone) 1 beta subcomplex, 5, 16kDa                       |
|         |             |                                                                                   |
| NDUFAB1 | 202077_at   | NADH dehydrogenase (ubiquinone) 1, alpha/beta subcomplex, 1, 8kDa                 |
| NDUFA9  | 208969_at   | NADH dehydrogenase (ubiquinone) 1 alpha subcomplex, 9, 39kDa                      |
| NDUFB2  | 218200_s_at | NADH dehydrogenase (ubiquinone) 1 beta subcomplex, 2, 8kDa                        |
| NDUFA1  | 202298_at   | NADH dehydrogenase (ubiquinone) 1 alpha subcomplex, 1, 7.5kDa                     |
|         |             | NADH dehydrogenase (ubiquinone) Fe-S protein 8, 23kDa (NADH-coenzyme Q reductase) |
| NDUFS8  | 203189_s_at |                                                                                   |
| NDUFA8  | 218160_at   | NADH dehydrogenase (ubiquinone) 1 alpha subcomplex, 8, 19kDa                      |
|         |             | NADH dehydrogenase (ubiquinone) Fe-S protein 7, 20kDa (NADH-coenzyme Q reductase) |
| NDUFS7  | 211752_s_at |                                                                                   |
| NDUFB11 | 218320_s_at | NADH dehydrogenase (ubiquinone) 1 beta subcomplex, 11, 17.3kDa                    |
| NDUFV1  | 208714_at   | NADH dehydrogenase (ubiquinone) flavoprotein 1, 51kDa                             |
|         | 217860_at   | NADH dehydrogenase (ubiquinone) 1 alpha subcomplex, 10, 42kDa                     |

NDUFA10

|         |             |                                                                                   |
|---------|-------------|-----------------------------------------------------------------------------------|
| NDUFA3  | 218563_at   | NADH dehydrogenase (ubiquinone) 1 alpha subcomplex, 3, 9kDa                       |
| NDUFB10 | 223112_s_at | NADH dehydrogenase (ubiquinone) 1 beta subcomplex, 10, 22kDa                      |
| NDUFS3  | 201740_at   | NADH dehydrogenase (ubiquinone) Fe-S protein 3, 30kDa (NADH-coenzyme Q reductase) |
| BCKDHB  | 210653_s_at | branched chain keto acid dehydrogenase E1, beta polypeptide                       |
| NDUFB3  | 203371_s_at | NADH dehydrogenase (ubiquinone) 1 beta subcomplex, 3, 12kDa                       |

Protein Ubiquitination Pathway

|         |              |                                                                        |
|---------|--------------|------------------------------------------------------------------------|
| VHL     | 203844_at    | von Hippel-Lindau tumor suppressor                                     |
| CBL     | 229010_at    | Cas-Br-M (murine) ecotropic retroviral transforming sequence           |
| USP36   | 220370_s_at  | ubiquitin specific peptidase 36                                        |
| DNAJC6  | 204720_s_at  | Dnaj (Hsp40) homolog, subfamily C, member 6                            |
| USP51   | 237247_at    | ubiquitin specific peptidase 51                                        |
| DNAJC21 | 230893_at    | Dnaj (Hsp40) homolog, subfamily C, member 21                           |
| USP12   | 213327_s_at  | ubiquitin specific peptidase 12                                        |
| MDM2    | 225160_x_at  | Mdm2 p53 binding protein homolog (mouse)                               |
| PSMD5   | 203447_at    | proteasome (prosome, macropain) 26S subunit, non-ATPase, 5             |
| NEDD4L  | 212448_at    | neural precursor cell expressed, developmentally down-regulated 4-like |
| HLA-C   | 216526_x_at  | major histocompatibility complex, class I, C                           |
| USP45   | 238057_at    | ubiquitin specific peptidase 45                                        |
| HSPA13  | 202558_s_at  | heat shock protein 70kDa family, member 13                             |
| HSPA14  | 226887_at    | heat shock 70kDa protein 14                                            |
| USP1    | 202412_s_at  | ubiquitin specific peptidase 1                                         |
| USP34   | 212065_s_at  | ubiquitin specific peptidase 34                                        |
| HSPB8   | 233057_at    | heat shock 22kDa protein 8                                             |
| USP54   | 227754_at    | Homo sapiens ubiquitin specific peptidase 54                           |
| USP42   | 226176_s_at  | ubiquitin specific peptidase 42                                        |
| USP33   | 212513_s_at  | ubiquitin specific peptidase 33                                        |
| SMURF2  | 205596_s_at  | SMAD specific E3 ubiquitin protein ligase 2                            |
| DNAJB14 | 222850_s_at  | Dnaj (Hsp40) homolog, subfamily B, member 14                           |
| DNAJC13 | 212467_at    | Dnaj (Hsp40) homolog, subfamily C, member 13                           |
| XIAP    | 225859_at    | X-linked inhibitor of apoptosis                                        |
| DNAJB1  | 200666_s_at  | Dnaj (Hsp40) homolog, subfamily B, member 1                            |
| USP9X   | 201100_s_at  | ubiquitin specific peptidase 9, X-linked                               |
| USP8    | 202745_at    | ubiquitin specific peptidase 8                                         |
| BIRC6   | 224635_s_at  | baculoviral IAP repeat containing 6                                    |
| UBE2G2  | 1557053_s_at | ubiquitin-conjugating enzyme E2G 2 (UBC7 homolog, yeast)               |
| CUL2    | 203079_s_at  | cullin 2                                                               |
| PSMD13  | 201232_s_at  | proteasome (prosome, macropain) 26S subunit, non-ATPase, 13            |
| PSMD6   | 202753_at    | proteasome (prosome, macropain) 26S subunit, non-ATPase, 6             |
| ANAPC5  | 200098_s_at  | anaphase promoting complex subunit 5                                   |
| PSMB1   | 200876_s_at  | proteasome (prosome, macropain) subunit, beta type, 1                  |
| CDC34   | 212540_at    | cell division cycle 34 homolog (S. cerevisiae)                         |
| PSMD14  | 212296_at    | proteasome (prosome, macropain) 26S subunit, non-ATPase, 14            |
| UBE2D3  | 200668_s_at  | ubiquitin-conjugating enzyme E2D 3 (UBC4/5 homolog, yeast)             |
| PSMB4   | 202243_s_at  | proteasome (prosome, macropain) subunit, beta type, 4                  |

|         |              |                                                                            |
|---------|--------------|----------------------------------------------------------------------------|
| UBE2N   | 201523_x_at  | ubiquitin-conjugating enzyme E2N (UBC13 homolog, yeast)                    |
| UBB     | 200633_at    | ubiquitin B                                                                |
| TCEB2   | 200085_s_at  | transcription elongation factor B (SIII), polypeptide 2 (18kDa, elongin B) |
| PSMA5   | 201274_at    | proteasome (prosome, macropain) subunit, alpha type, 5                     |
| PSMA1   | 210759_s_at  | proteasome (prosome, macropain) subunit, alpha type, 1                     |
| STUB1   | 217934_x_at  |                                                                            |
| RBX1    | 218117_at    | ring-box 1, E3 ubiquitin protein ligase                                    |
| USP2    | 229337_at    | ubiquitin specific peptidase 2                                             |
| UBE2A   | 201898_s_at  | ubiquitin-conjugating enzyme E2A (RAD6 homolog)                            |
| CRYAB   | 209283_at    | crystallin, alpha B                                                        |
| DNAJC25 | 226859_at    | Dnaj (Hsp40) homolog, subfamily C , member 25                              |
| USP21   | 218367_x_at  | ubiquitin specific peptidase 21                                            |
| PSMD9   | 207805_s_at  | proteasome (prosome, macropain) 26S subunit, non-ATPase, 9                 |
| TCEB1   | 202824_s_at  | transcription elongation factor B (SIII), polypeptide 1 (15kDa, elongin C) |
| DNAJC1  | 218409_s_at  | proteasome (prosome, macropain) subunit, beta type, 6                      |
| PSMB6   | 208827_at    |                                                                            |
| DNAJC19 | 225358_at    | Dnaj (Hsp40) homolog, subfamily C, member 19                               |
| UBE2D4  | 221949_at    | Homo sapiens ubiquitin-conjugating enzyme E2D 4                            |
| PSMB10  | 202659_at    | proteasome (prosome, macropain) subunit, beta type, 10                     |
| BAG1    | 202387_at    | BCL2-associated athanogene                                                 |
| THOP1   | 203235_at    | thimet oligopeptidase 1                                                    |
| DNAJC17 | 219861_at    | Dnaj (Hsp40) homolog, subfamily C, member 17                               |
| DNAJC12 | 223721_s_at  | Dnaj (Hsp40) homolog, subfamily C, member 12                               |
| DNAJC28 | 220372_at    | Dnaj (Hsp40) homolog, subfamily C, member 28                               |
| ANAPC11 | 226414_s_at  | anaphase promoting complex subunit 11                                      |
| DNAJC14 | 1554451_s_at | Dnaj (Hsp40) homolog, subfamily C, member 14                               |

#### BMP signaling pathway

|         |             |                                                                                            |
|---------|-------------|--------------------------------------------------------------------------------------------|
| FST     | 226847_at   | folliculin                                                                                 |
| NOG     | 231798_at   | noggin                                                                                     |
| NFKB2   | 209636_at   | nuclear factor of kappa light polypeptide gene enhancer in B-cells 2 (p49/p100)            |
| SMAD7   | 204790_at   | SMAD family member 7                                                                       |
| BMP2    | 205289_at   | bone morphogenetic protein 2                                                               |
| SMAD1   | 208015_at   | SMAD family member 1                                                                       |
| SMAD9   | 227719_at   | SMAD family member 9                                                                       |
| SMAD5   | 205187_at   | SMAD family member 5                                                                       |
| BMP5    | 205430_at   | bone morphogenetic protein 5                                                               |
| PRKAR1A | 200605_s_at | protein kinase, cAMP-dependent, regulatory, type I, alpha (tissue specific extinguisher 1) |
| JUN     | 201465_s_at | jun proto-oncogene                                                                         |
| ATF2    | 212984_at   | activating transcription factor 2                                                          |
| KRAS    | 204009_s_at | v-Ki-ras2 Kirsten rat sarcoma viral oncogene homolog                                       |
| SOS1    | 227426_at   | son of sevenless homolog 1 (Drosophila)                                                    |
| CREB1   | 204313_s_at | cAMP responsive element binding protein 1                                                  |
| MRAS    | 225185_at   | muscle RAS oncogene homolog                                                                |
| MAPK1   | 224621_at   | mitogen-activated protein kinase 1                                                         |
| CREBBP  | 202160_at   | CREB binding protein                                                                       |

|        |             |                                                                        |
|--------|-------------|------------------------------------------------------------------------|
| XIAP   | 225859_at   | X-linked inhibitor of apoptosis                                        |
| BMPR2  | 225144_at   | bone morphogenetic protein receptor, type II (serine/threonine kinase) |
| NRAS   | 202647_s_at | neuroblastoma RAS viral (v-ras) oncogene homolog                       |
| BMPR1A | 230979_at   | bone morphogenetic protein receptor, type IA                           |
| MAPK3  | 212046_x_at | mitogen-activated protein kinase 3                                     |
| MAP2K2 | 202424_at   | mitogen-activated protein kinase kinase 2                              |
| PRKAG1 | 201805_at   | protein kinase, AMP-activated, gamma 1 non-catalytic subunit           |

### 3 wks rehab vs. control

| Gene    | Affymetrix accession # | Gene description                                                       |
|---------|------------------------|------------------------------------------------------------------------|
|         |                        | Protein Ubiquitination Pathway                                         |
| HSPA6   | 213418_at              | heat shock 70kDa protein 6 (HSP70B')                                   |
| USP27X  | 217605_at              | ubiquitin specific peptidase 27, X-linked                              |
| UBE2C   | 202954_at              | ubiquitin-conjugating enzyme E2C                                       |
| USP36   | 220370_s_at            | ubiquitin specific peptidase 36                                        |
| B2M     | 232311_at              | beta-2-microglobulin                                                   |
| CBL     | 225231_at              | Cas-Br-M (murine) ecotropic retroviral transforming sequence           |
| HLA-B   | 208729_x_at            | major histocompatibility complex, class I, B                           |
| NEDD4L  | 212445_s_at            | neural precursor cell expressed, developmentally down-regulated 4-like |
| USP9X   | 229573_at              | ubiquitin specific peptidase 9, X-linked                               |
| HLA-C   | 216526_x_at            | major histocompatibility complex, class I, C                           |
| SMURF2  | 227489_at              | SMAD specific E3 ubiquitin protein ligase 2                            |
| HLA-A   | 215313_x_at            | Homo sapiens major histocompatibility complex, class I, A (            |
| HSPA12B | 229172_at              | heat shock 70kD protein 12B                                            |
| HSPB11  | 203960_s_at            | heat shock protein family B (small), member 11                         |
| HSPA14  | 226887_at              | heat shock 70kDa protein 14                                            |
| USP33   | 212513_s_at            | ubiquitin specific peptidase 33                                        |
| DNAJB14 | 222850_s_at            | DnaJ (Hsp40) homolog, subfamily B, member 14                           |
| HSPA12A | 214434_at              | heat shock 70kDa protein 12A                                           |
| USP1    | 202413_s_at            | ubiquitin specific peptidase 1                                         |
| UBE2V1  | 201003_x_at            | TMEM189-UBE2V1 readthrough                                             |
| USP48   | 220079_s_at            | ubiquitin specific peptidase 48                                        |
| SUGT1   | 223329_x_at            | SGT1, suppressor of G2 allele of SKP1 ( <i>S. cerevisiae</i> )         |
| UBA1    | 200964_at              | ubiquitin-like modifier activating enzyme 1                            |
| USP47   | 221518_s_at            | ubiquitin specific peptidase 47                                        |
| XIAP    | 235222_x_at            | Homo sapiens X-linked inhibitor of apoptosis                           |
| PSMC5   | 209503_s_at            | proteasome (prosome, macropain) 26S subunit, ATPase, 5                 |
| DNAJC24 | 213853_at              | DnaJ (Hsp40) homolog, subfamily C, member 24                           |
| PSMB1   | 200876_s_at            | proteasome (prosome, macropain) subunit, beta type, 1                  |
| DNAJB9  | 202842_s_at            | DnaJ (Hsp40) homolog, subfamily B, member 9                            |
| PSMD2   | 200830_at              | proteasome (prosome, macropain) 26S subunit, non-ATPase, 2             |
| UBE3B   | 212403_at              | ubiquitin protein ligase E3B                                           |
| PSMC1   | 204219_s_at            | proteasome (prosome, macropain) 26S subunit, ATPase, 1                 |
| CUL2    | 203079_s_at            | cullin 2                                                               |
| PSMB4   | 202243_s_at            | proteasome (prosome, macropain) subunit, beta type, 4                  |
| PSMA6   | 208805_at              | proteasome (prosome, macropain) subunit, alpha type, 6                 |
| PSMA2   | 201317_s_at            | proteasome (prosome, macropain) subunit, alpha type, 2                 |
| DNAJB2  | 202500_at              | DnaJ (Hsp40) homolog, subfamily B, member 2                            |
| AMFR    | 202204_s_at            | Homo sapiens autocrine motility factor receptor                        |
| CDC34   | 212540_at              | cell division cycle 34 homolog ( <i>S. cerevisiae</i> )                |
| CRYAB   | 209283_at              | crystallin, alpha B                                                    |
| UBE2D3  | 200668_s_at            | ubiquitin-conjugating enzyme E2D 3 (UBC4/5 homolog, yeast)             |
| PSMD4   | 211609_x_at            | proteasome (prosome, macropain) 26S subunit, non-ATPase, 4             |
| PSMD6   | 202753_at              | proteasome (prosome, macropain) 26S subunit, non-ATPase, 6             |



|               |                                                                  |                                                                            |
|---------------|------------------------------------------------------------------|----------------------------------------------------------------------------|
| PSMB2         | 200039_s_at                                                      | proteasome (prosome, macropain) subunit, beta type, 2                      |
| BAG1          | 202387_at                                                        | BCL2-associated athanogene                                                 |
| PSMA1         | 201676_x_at                                                      | proteasome (prosome, macropain) subunit, alpha type, 1                     |
| UBE2N         | 201523_x_at                                                      | ubiquitin-conjugating enzyme E2N (UBC13 homolog, yeast)                    |
| PSMD13        | 201232_s_at                                                      | proteasome (prosome, macropain) 26S subunit, non-ATPase, 13                |
| USP13         | 227788_at                                                        | ubiquitin specific peptidase 13 (isopeptidase T-3)                         |
| PSMC2         | 201067_at                                                        | proteasome (prosome, macropain) 26S subunit, ATPase, 2                     |
| PSMB5         | 208799_at                                                        | proteasome (prosome, macropain) subunit, beta type, 5                      |
| PSMD12        | 202352_s_at                                                      | proteasome (prosome, macropain) 26S subunit, non-ATPase, 12                |
| PSMA7         | 201114_x_at                                                      | proteasome (prosome, macropain) subunit, alpha type, 7                     |
| PSMD1         | 201198_s_at                                                      | proteasome (prosome, macropain) 26S subunit, non-ATPase, 1                 |
| PSMD14        | 212296_at                                                        | proteasome (prosome, macropain) 26S subunit, non-ATPase, 14                |
| PSMA3         | 201532_at                                                        | proteasome (prosome, macropain) subunit, alpha type, 3                     |
| UBE2M         | 203109_at                                                        | Homo sapiens ubiquitin-conjugating enzyme E2M                              |
| UBE2F         | 225783_at                                                        | ubiquitin-conjugating enzyme E2F (putative)                                |
| PSMA5         | 201274_at                                                        | proteasome (prosome, macropain) subunit, alpha type, 5                     |
| HSP90AA1      | 210211_s_at                                                      | heat shock protein 90kDa alpha (cytosolic), class A member 1               |
| TCEB1         | 202824_s_at                                                      | transcription elongation factor B (SIII), polypeptide 1 (15kDa, elongin C) |
| DNAJC8        | 212490_at                                                        | DnaJ (Hsp40) homolog, subfamily C, member 8                                |
| HSPE1         | 205133_s_at                                                      | Homo sapiens heat shock 10kDa protein 1                                    |
| PSMD11        | 208777_s_at                                                      | proteasome (prosome, macropain) 26S subunit, non-ATPase, 11                |
| DNAJC11       | 215792_s_at                                                      | DnaJ (Hsp40) homolog, subfamily C, member 11                               |
| HSPD1         | 200806_s_at                                                      | Homo sapiens heat shock 60kDa protein 1                                    |
| PSMB6         | 208827_at                                                        | proteasome (prosome, macropain) subunit, beta type, 6                      |
| HSP90AB1      | 214359_s_at                                                      | Homo sapiens heat shock protein 90kDa alpha (cytosolic), class B member 1  |
| THOP1         | 203235_at                                                        | thimet oligopeptidase 1                                                    |
| UBB           | 217125_at                                                        | Homo sapiens ubiquitin B                                                   |
| PSMD3         | 201388_at                                                        | proteasome (prosome, macropain) 26S subunit, non-ATPase, 3                 |
| HSPA1A/HSPA1B | 200799_at                                                        | Homo sapiens heat shock 70kDa protein 1A                                   |
| PSMD8         | 200820_at                                                        | proteasome (prosome, macropain) 26S subunit, non-ATPase, 8                 |
| USP24         | 212381_at                                                        | ubiquitin specific peptidase 24                                            |
| USP54         | 227334_at                                                        | ubiquitin specific peptidase 54                                            |
| UBE2L3        | 200676_s_at                                                      | ubiquitin-conjugating enzyme E2L 3                                         |
| HSPA8         | 208687_x_at                                                      | heat shock 70kDa protein 8                                                 |
| HSPH1         | 208744_x_at                                                      | Homo sapiens HSP105 alpha                                                  |
| USP3          | 201536_at                                                        | ubiquitin specific peptidase 3                                             |
| DNAJB6        | 209015_s_at                                                      | DnaJ (Hsp40) homolog, subfamily B, member 6                                |
| DNAJB4        | 203811_s_at                                                      | DnaJ (Hsp40) homolog, subfamily B, member 4                                |
| DNAJC28       | 220372_at                                                        | DnaJ (Hsp40) homolog, subfamily C, member 28                               |
| HSPA9         | 200690_at                                                        | heat shock 70kDa protein 9 (mortalin)                                      |
| DNAJC14       | 1554451_s_at                                                     | DnaJ (Hsp40) homolog, subfamily C, member 14                               |
|               | FcγR Receptor-mediated Phagocytosis in Macrophages and Monocytes |                                                                            |
| ACTA2         | 243140_at                                                        | actin, alpha 2, smooth muscle, aorta                                       |
| FCGR2A        | 203561_at                                                        | Fc fragment of IgG, low affinity IIa, receptor (CD32)                      |
| VAV2          | 226063_at                                                        | vav 2 guanine nucleotide exchange factor                                   |
| LYN           | 202625_at                                                        | v-yes-1 Yamaguchi sarcoma viral related oncogene homolog                   |

|         |                    |                                                                                 |
|---------|--------------------|---------------------------------------------------------------------------------|
| AKT2    | 203809_s_at        | v-akt murine thymoma viral oncogene homolog 2                                   |
| LCP2    | 205270_s_at        | lymphocyte cytosolic protein 2 (SH2 domain containing leukocyte protein of 76   |
| AKT3    | 212609_s_at        | v-akt murine thymoma viral oncogene homolog 3 (protein kinase B, gamma)         |
| SYK     | 226068_at          | spleen tyrosine kinase                                                          |
| HCK     | 208018_s_at        | hemopoietic cell kinase                                                         |
| RAC2    | 213603_s_at        | ras-related C3 botulinum toxin substrate 2 (rho family, small GTP binding prote |
| INPP5D  | 203332_s_at        | inositol polyphosphate-5-phosphatase, 145kDa                                    |
| PLD1    | 226636_at          | phospholipase D1, phosphatidylcholine-specific                                  |
| FYN     | 210105_s_at        | FYN oncogene related to SRC, FGR, YES                                           |
| FYB     | 211795_s_at        | FYN binding protein                                                             |
| ARPC5   | 211963_s_at        | actin related protein 2/3 complex, subunit 5, 16kDa                             |
| EZR     | 217234_s_at        | ezrin                                                                           |
| CBL     | 225231_at          | Cas-Br-M (murine) ecotropic retroviral transforming sequence                    |
| PAK1    | 226507_at          | p21 protein (Cdc42/Rac)-activated kinase 1                                      |
| PLCG1   | 202789_at          | phospholipase C, gamma 1                                                        |
| MYO5A   | 227761_at          | myosin VA (heavy chain 12, myosin)                                              |
| YES1    | 202932_at          | v-yes-1 Yamaguchi sarcoma viral oncogene homolog 1                              |
| ACTG1   | 201550_x_at        | actin, gamma 1                                                                  |
| PXN     | 201087_at          | paxillin                                                                        |
| PTEN    | 233314_at          | phosphatase and tensin homolog                                                  |
| PRKCI   | 213518_at          | protein kinase C, iota                                                          |
| VAMP3   | 211749_s_at        | vesicle-associated membrane protein 3 (cellubrevin)                             |
| PIP5K1A | 207391_s_at        | phosphatidylinositol-4-phosphate 5-kinase, type I, alpha                        |
|         | AFFX-              |                                                                                 |
| ACTB    | HSAC07/X00351_5_at | actin, beta                                                                     |
| ARF6    | 203311_s_at        | ADP-ribosylation factor 6                                                       |
| MAPK1   | 208351_s_at        | mitogen-activated protein kinase 1                                              |
| RAB11B  | 217793_at          | RAB11B, member RAS oncogene family                                              |

#### ILK Signaling

|         |             |                                                                          |
|---------|-------------|--------------------------------------------------------------------------|
| MYL5    | 205145_s_at | myosin, light chain 5, regulatory                                        |
| MYH8    | 206717_at   | myosin, heavy chain 8, skeletal muscle, perinatal                        |
| MYH1    | 205951_at   | myosin, heavy chain 1, skeletal muscle, adult                            |
| ACTA2   | 243140_at   | actin, alpha 2, smooth muscle, aorta                                     |
| ACTN3   | 206891_at   | actinin, alpha 3                                                         |
| ITGB8   | 226189_at   | integrin, beta 8                                                         |
| MYH13   | 208208_at   | myosin, heavy chain 13, skeletal muscle                                  |
| PARVA   | 222454_s_at | parvin, alpha                                                            |
| FBLIM1  | 225258_at   | filamin binding LIM protein 1                                            |
| MYH4    | 208148_at   | myosin, heavy chain 4, skeletal muscle                                   |
| TGFB111 | 209651_at   | transforming growth factor beta 1 induced transcript 1                   |
| PIK3CD  | 203879_at   | phosphoinositide-3-kinase, catalytic, delta polypeptide                  |
| AKT2    | 203809_s_at | v-akt murine thymoma viral oncogene homolog 2                            |
| BMP2    | 205289_at   | bone morphogenetic protein 2                                             |
| ITGB2   | 202803_s_at | integrin, beta 2 (complement component 3 receptor 3 and 4 subunit)       |
| MYL6    | 214002_at   | Homo sapiens myosin, light chain 6, alkali, smooth muscle and non-muscle |
| AKT3    | 212609_s_at | v-akt murine thymoma viral oncogene homolog 3 (protein kinase B, gamma)  |

|               |                    |                                                                                         |
|---------------|--------------------|-----------------------------------------------------------------------------------------|
| VIM           | 201426_s_at        | vimentin                                                                                |
| FN1           | 211719_x_at        | fibronectin 1                                                                           |
| RHOB          | 212099_at          | ras homolog gene family, member B                                                       |
| TMSB10/TMSB4X | 217733_s_at        | thymosin beta 10                                                                        |
| PTK2          | 1559529_at         | PTK2 protein tyrosine kinase 2                                                          |
| CTNNB1        | 223679_at          | catenin (cadherin-associated protein), beta 1, 88kDa                                    |
| RHOJ          | 243481_at          | ras homolog gene family, member J                                                       |
| PDGFC         | 218718_at          | platelet derived growth factor C                                                        |
| HIF1A         | 200989_at          | hypoxia inducible factor 1, alpha subunit (basic helix-loop-helix transcription factor) |
| ACTG1         | 201550_x_at        | actin, gamma 1                                                                          |
| ITGB5         | 201124_at          | integrin, beta 5                                                                        |
| PXN           | 201087_at          | paxillin                                                                                |
| PTEN          | 233314_at          | phosphatase and tensin homolog                                                          |
| PIK3C2A       | 241905_at          | phosphoinositide-3-kinase, class 2, alpha polypeptide                                   |
| CHD1          | 204258_at          | chromodomain helicase DNA binding protein 1                                             |
| ITGB1         | 211945_s_at        | integrin, beta 1 (fibronectin receptor, beta polypeptide, antigen CD29 includes MSK12)  |
| PPP2R5C       | 1557718_at         | protein phosphatase 2, regulatory subunit B', gamma                                     |
| RHOT2         | 65770_at           | ras homolog gene family, member T2                                                      |
| SH2B2         | 205367_at          | SH2B adaptor protein 2                                                                  |
|               | AFFX-              |                                                                                         |
| ACTB          | HSAC07/X00351_5_at | actin, beta                                                                             |
| PPP2R2A       | 202313_at          | protein phosphatase 2, regulatory subunit B, alpha                                      |
| ACTN2         | 203861_s_at        | actinin, alpha 2                                                                        |
| MAPK1         | 208351_s_at        | mitogen-activated protein kinase 1                                                      |
| CFL2          | 224352_s_at        | cofilin 2 (muscle)                                                                      |
| TESK1         | 204106_at          | testis-specific kinase 1                                                                |
| PPP2R1A       | 200695_at          | protein phosphatase 2, regulatory subunit A, alpha                                      |
| MYH7B         | 233949_s_at        | myosin, heavy chain 7B, cardiac muscle, beta                                            |
| PPP2R5B       | 635_s_at           | protein phosphatase 2, regulatory subunit B', beta                                      |
| MYH14         | 226988_s_at        | myosin, heavy chain 14, non-muscle                                                      |
| MAP2K6        | 205698_s_at        | mitogen-activated protein kinase kinase 6                                               |
| FLNC          | 207876_s_at        | filamin C, gamma                                                                        |
| VEGFA         | 210513_s_at        | vascular endothelial growth factor A                                                    |
| PARVB         | 216254_at          | parvin, beta                                                                            |
|               | Integrin Signaling |                                                                                         |
| MYL5          | 205145_s_at        | myosin, light chain 5, regulatory                                                       |
| CAPN6         | 202965_s_at        | calpain 6                                                                               |
| ACTA2         | 243140_at          | actin, alpha 2, smooth muscle, aorta                                                    |
| TSPAN2        | 214606_at          | tetraspanin 2                                                                           |
| ACTN3         | 206891_at          | actinin, alpha 3                                                                        |
| ITGB8         | 226189_at          | integrin, beta 8                                                                        |
| ITGA4         | 213416_at          | integrin, alpha 4 (antigen CD49D, alpha 4 subunit of VLA-4 receptor)                    |
| PARVA         | 222454_s_at        | parvin, alpha                                                                           |
| PIK3CD        | 203879_at          | phosphoinositide-3-kinase, catalytic, delta polypeptide                                 |
| AKT2          | 203809_s_at        | v-akt murine thymoma viral oncogene homolog 2                                           |
| ITGB2         | 202803_s_at        | integrin, beta 2 (complement component 3 receptor 3 and 4 subunit)                      |

|          |                    |                                                                                 |
|----------|--------------------|---------------------------------------------------------------------------------|
| AKT3     | 212609_s_at        | v-akt murine thymoma viral oncogene homolog 3 (protein kinase B, gamma)         |
| RAC2     | 213603_s_at        | ras-related C3 botulinum toxin substrate 2 (rho family, small GTP binding prote |
| RAP2B    | 213923_at          | RAP2B, member of RAS oncogene family                                            |
| ITGA9    | 227297_at          | integrin, alpha 9                                                               |
| RHOB     | 212099_at          | ras homolog gene family, member B                                               |
| WIPF1    | 202663_at          | WAS/WASL interacting protein family, member 1                                   |
| PTK2     | 1559529_at         | PTK2 protein tyrosine kinase 2                                                  |
| FYN      | 210105_s_at        | FYN oncogene related to SRC, FGR, YES                                           |
| ARPC5    | 211963_s_at        | actin related protein 2/3 complex, subunit 5, 16kDa                             |
| RHOJ     | 243481_at          | ras homolog gene family, member J                                               |
| PAK1     | 226507_at          | p21 protein (Cdc42/Rac)-activated kinase 1                                      |
| ASAP1    | 224791_at          | ArfGAP with SH3 domain, ankyrin repeat and PH domain 1                          |
| PLCG1    | 202789_at          | phospholipase C, gamma 1                                                        |
| LIMS1    | 1570259_at         | LIM and senescent cell antigen-like domains 1                                   |
| CAV1     | 203065_s_at        | caveolin 1, caveolae protein, 22kDa                                             |
| ACTG1    | 201550_x_at        | actin, gamma 1                                                                  |
| ITGB5    | 201124_at          | integrin, beta 5                                                                |
| PXN      | 201087_at          | paxillin                                                                        |
| PTEN     | 233314_at          | phosphatase and tensin homolog                                                  |
| RAP1B    | 200833_s_at        | RAP1B, member of RAS oncogene family                                            |
| SHC1     | 214853_s_at        | SHC (Src homology 2 domain containing) transforming protein 1                   |
| PIK3C2A  | 241905_at          | phosphoinositide-3-kinase, class 2, alpha polypeptide                           |
| ARHGAP26 | 226576_at          | Rho GTPase activating protein 26                                                |
| ARHGAP5  | 217936_at          | Rho GTPase activating protein 5                                                 |
| RALB     | 202100_at          | v-ral simian leukemia viral oncogene homolog B (ras related; GTP binding prote  |
| ARHGEF7  | 202548_s_at        | Rho guanine nucleotide exchange factor (GEF) 7                                  |
| ITGA6    | 215177_s_at        | integrin, alpha 6                                                               |
|          |                    | integrin, beta 1 (fibronectin receptor, beta polypeptide, antigen CD29 includes |
| ITGB1    | 211945_s_at        | MSK12)                                                                          |
| ARF1     | 200065_s_at        | ADP-ribosylation factor 1                                                       |
| CAPN7    | 203356_at          | calpain 7                                                                       |
| TSPAN7   | 202242_at          | tetraspanin 7                                                                   |
| RHOT2    | 65770_at           | ras homolog gene family, member T2                                              |
|          | AFFX-              |                                                                                 |
| ACTB     | HSAC07/X00351_5_at | actin, beta                                                                     |
| ARF6     | 203311_s_at        | ADP-ribosylation factor 6                                                       |
| ACTN2    | 203861_s_at        | actinin, alpha 2                                                                |
| MAPK1    | 208351_s_at        | mitogen-activated protein kinase 1                                              |
| MYL12A   | 201319_at          | myosin, light chain 12A, regulatory, non-sarcomeric                             |
| MRAS     | 206538_at          | muscle RAS oncogene homolog                                                     |
| BCAR3    | 204032_at          | breast cancer anti-estrogen resistance 3                                        |
| PARVB    | 216254_at          | parvin, beta                                                                    |

#### Antigen Presentation Pathway

|          |             |                                                        |
|----------|-------------|--------------------------------------------------------|
| NLRC5    | 226474_at   | NLR family, CARD domain containing 5                   |
| HLA-DPB1 | 201137_s_at | major histocompatibility complex, class II, DP beta 1  |
| B2M      | 232311_at   | beta-2-microglobulin                                   |
| HLA-DPA1 | 211990_at   | major histocompatibility complex, class II, DP alpha 1 |

|         |             |                                                       |
|---------|-------------|-------------------------------------------------------|
| HLA-DRA | 208894_at   | major histocompatibility complex, class II, DR alpha  |
| HLA-B   | 208729_x_at | major histocompatibility complex, class I, B          |
| HLA-F   | 204806_x_at | major histocompatibility complex, class I, F          |
| HLA-DMA | 217478_s_at | major histocompatibility complex, class II, DM alpha  |
| HLA-E   | 200904_at   | major histocompatibility complex, class I, E          |
| HLA-C   | 216526_x_at | major histocompatibility complex, class I, C          |
| HLA-DMB | 203932_at   | major histocompatibility complex, class II, DM beta   |
| HLA-A   | 215313_x_at | major histocompatibility complex, class I, A          |
| HLA-G   | 211528_x_at | major histocompatibility complex, class I, G          |
| PSMB5   | 208799_at   | proteasome (prosome, macropain) subunit, beta type, 5 |
| PSMB6   | 208827_at   | proteasome (prosome, macropain) subunit, beta type, 6 |

## 6 wks rehab vs. control

| <b>Gene</b> | <b>Affymetrix accession #</b> | <b>Gene description</b>                                                                 |
|-------------|-------------------------------|-----------------------------------------------------------------------------------------|
|             |                               | Molecular Mechanisms of Cancer                                                          |
| GNA15       | 205349_at                     | guanine nucleotide binding protein (G protein), alpha 15 (Gq class)                     |
| CCND1       | 208712_at                     | cyclin D1                                                                               |
| SMAD7       | 204790_at                     | SMAD family member 7                                                                    |
| FAS         | 204781_s_at                   | Fas (TNF receptor superfamily, member 6)                                                |
| SMAD9       | 227719_at                     | SMAD family member 9                                                                    |
| PRKD1       | 205880_at                     | protein kinase D1                                                                       |
| IRS1        | 242979_at                     | insulin receptor substrate 1                                                            |
| BMP2        | 205290_s_at                   | bone morphogenetic protein 2                                                            |
| BID         | 204493_at                     | BH3 interacting domain death agonist                                                    |
| BMP5        | 205430_at                     | bone morphogenetic protein 5                                                            |
| RHOB        | 212099_at                     | ras homolog gene family, member B                                                       |
| PTK2        | 1559529_at                    | PTK2 protein tyrosine kinase 2                                                          |
| FYN         | 210105_s_at                   | FYN oncogene related to SRC, FGR, YES                                                   |
| SYNGAP1     | 230297_x_at                   | synaptic Ras GTPase activating protein 1                                                |
| CTNNB1      | 223679_at                     | catenin (cadherin-associated protein), beta 1, 88kDa                                    |
| MYC         | 202431_s_at                   | v-myc myelocytomatosis viral oncogene homolog (avian)                                   |
| CDK6        | 224847_at                     | cyclin-dependent kinase 6                                                               |
| RALGDS      | 209050_s_at                   | ral guanine nucleotide dissociation stimulator                                          |
| TCF4        | 203753_at                     | transcription factor 4                                                                  |
| JUN         | 201466_s_at                   | jun proto-oncogene                                                                      |
| RAP2B       | 213923_at                     | RAP2B, member of RAS oncogene family                                                    |
| RHOJ        | 238905_at                     | ras homolog gene family, member J                                                       |
| GAB1        | 229114_at                     | GRB2-associated binding protein 1                                                       |
| RHOC        | 200885_at                     | ras homolog gene family, member C                                                       |
| ARHGEF2     | 207629_s_at                   | Rho/Rac guanine nucleotide exchange factor (GEF) 2                                      |
| FZD4        | 218665_at                     | frizzled homolog 4 (Drosophila)                                                         |
| TCF3        | 213811_x_at                   | transcription factor 3 (E2A immunoglobulin enhancer binding factors E12/E47)            |
| HIF1A       | 200989_at                     | hypoxia inducible factor 1, alpha subunit (basic helix-loop-helix transcription factor) |
| TGFBR2      | 208944_at                     | transforming growth factor, beta receptor II (70/80kDa)                                 |
| GNAI2       | 201040_at                     | guanine nucleotide binding protein (G protein), alpha inhibiting activity polypeptide   |
| RAP1B       | 200833_s_at                   | RAP1B, member of RAS oncogene family                                                    |
| CASP7       | 207181_s_at                   | caspase 7, apoptosis-related cysteine peptidase                                         |
| SMAD1       | 210993_s_at                   | SMAD family member 1                                                                    |
| PLCB1       | 213222_at                     | phospholipase C, beta 1 (phosphoinositide-specific)                                     |
| RBPJ        | 207785_s_at                   | recombination signal binding protein for immunoglobulin kappa J region                  |
| GNAI3       | 201179_s_at                   | guanine nucleotide binding protein (G protein), alpha inhibiting activity polypeptide   |
| FNBP1       | 212288_at                     | formin binding protein 1                                                                |
| CDC42       | 208728_s_at                   | cell division cycle 42 (GTP binding protein, 25kDa)                                     |
| LAMTOR3     | 217971_at                     | late endosomal/lysosomal adaptor, MAPK and MTOR activator 3                             |
| MAP2K4      | 203266_s_at                   | mitogen-activated protein kinase kinase 4                                               |
| XIAP        | 235222_x_at                   | X-linked inhibitor of apoptosis                                                         |
| RHOT2       | 221789_x_at                   | ras homolog gene family, member T2                                                      |
| MAPK14      | 210449_x_at                   | mitogen-activated protein kinase 14                                                     |

|          |             |                                                              |
|----------|-------------|--------------------------------------------------------------|
| CASP9    | 210775_x_at | caspase 9, apoptosis-related cysteine peptidase              |
| MAP2K2   | 202424_at   | mitogen-activated protein kinase kinase 2                    |
| LRP6     | 34697_at    | low density lipoprotein receptor-related protein 6           |
| MAPK3    | 212046_x_at | mitogen-activated protein kinase 3                           |
| CFLAR    | 209508_x_at | CASP8 and FADD-like apoptosis regulator                      |
| CAMK2B   | 213276_at   | calcium/calmodulin-dependent protein kinase II beta          |
| HIPK2    | 213763_at   | homeodomain interacting protein kinase 2                     |
| AKT2     | 236664_at   | v-akt murine thymoma viral oncogene homolog 2                |
| PA2G4    | 216422_at   | proliferation-associated 2G4, 38kDa                          |
| PRKAG1   | 201805_at   | protein kinase, AMP-activated, gamma 1 non-catalytic subunit |
| PSEN1    | 207782_s_at | presenilin 1                                                 |
| SMAD5    | 205188_s_at | SMAD family member 5                                         |
| JAK1     | 239695_at   | Janus kinase 1                                               |
| GSK3B    | 240562_at   | Isoform 1 of Glycogen synthase kinase-3 beta                 |
| ARHGEF12 | 1566093_at  | Rho guanine nucleotide exchange factor (GEF) 12              |

#### ILK Signaling

|               |             |                                                                                         |
|---------------|-------------|-----------------------------------------------------------------------------------------|
| MYL5          | 205145_s_at | myosin, light chain 5, regulatory                                                       |
| CCND1         | 208712_at   | cyclin D1                                                                               |
| ACTA2         | 243140_at   | actin, alpha 2, smooth muscle, aorta                                                    |
| PGF           | 209652_s_at | placental growth factor                                                                 |
| FN1           | 211719_x_at |                                                                                         |
| IRS1          | 242979_at   | insulin receptor substrate 1                                                            |
| BMP2          | 205290_s_at | bone morphogenetic protein 2                                                            |
| TMSB10/TMSB4X | 217733_s_at | thymosin beta 10                                                                        |
| RHOB          | 212099_at   | ras homolog gene family, member B                                                       |
| PTK2          | 1559529_at  | PTK2 protein tyrosine kinase 2                                                          |
| VIM           | 201426_s_at | vimentin                                                                                |
| CTNNB1        | 223679_at   | catenin (cadherin-associated protein), beta 1, 88kDa                                    |
| PDGFC         | 218718_at   | platelet derived growth factor C                                                        |
| MYC           | 202431_s_at | v-myc myelocytomatosis viral oncogene homolog (avian)                                   |
| JUN           | 201466_s_at | jun proto-oncogene                                                                      |
| RHOJ          | 238905_at   | ras homolog gene family, member J                                                       |
| RHOC          | 200885_at   | ras homolog gene family, member C                                                       |
| ACTB          | 213867_x_at | actin, beta                                                                             |
| HIF1A         | 200989_at   | hypoxia inducible factor 1, alpha subunit (basic helix-loop-helix transcription factor) |
| ACTG1         | 211983_x_at | actin, gamma 1                                                                          |
| PTEN          | 233254_x_at | phosphatase and tensin homolog                                                          |
| PARVA         | 1563458_at  | parvin, alpha                                                                           |
| FNBP1         | 212288_at   | formin binding protein 1                                                                |
| CDC42         | 208728_s_at | cell division cycle 42 (GTP binding protein, 25kDa)                                     |
| MAP2K4        | 203266_s_at | mitogen-activated protein kinase kinase 4                                               |
| PPP2R5D       | 202513_s_at | protein phosphatase 2, regulatory subunit B', delta                                     |
| RHOT2         | 221789_x_at | ras homolog gene family, member T2                                                      |
| PPP2R5B       | 635_s_at    | protein phosphatase 2, regulatory subunit B', beta                                      |
| MAPK3         | 212046_x_at | mitogen-activated protein kinase 3                                                      |

|         |             |                                                                         |
|---------|-------------|-------------------------------------------------------------------------|
| AKT2    | 236664_at   | v-akt murine thymoma viral oncogene homolog 2                           |
| ACTN2   | 203863_at   | actinin, alpha 2                                                        |
| PPP2R1A | 200695_at   | protein phosphatase 2, regulatory subunit A, alpha                      |
| PPP2CA  | 235502_at   | Serine/threonine-protein phosphatase 2A catalytic subunit alpha isoform |
| GSK3B   | 240562_at   | Isoform 1 of Glycogen synthase kinase-3 beta                            |
| ITGB3   | 204627_s_at | integrin, beta 3 (platelet glycoprotein IIIa, antigen CD61)             |

#### Clathrin-mediated Endocytosis Signaling

|         |              |                                                                    |
|---------|--------------|--------------------------------------------------------------------|
| USP9X   | 230543_at    | ubiquitin specific peptidase 9, X-linked                           |
| ACTA2   | 243140_at    | actin, alpha 2, smooth muscle, aorta                               |
| IGF1    | 209540_at    | insulin-like growth factor 1 (somatomedin C)                       |
| PGF     | 209652_s_at  | placental growth factor                                            |
| PDGFD   | 219304_s_at  | platelet derived growth factor D                                   |
| ARRB1   | 43511_s_at   | arrestin, beta 1                                                   |
| DAB2    | 201278_at    | disabled homolog 2, mitogen-responsive phosphoprotein (Drosophila) |
| PDGFC   | 218718_at    | platelet derived growth factor C                                   |
| ACTB    | 213867_x_at  | actin, beta                                                        |
| ARF6    | 224788_at    | ADP-ribosylation factor 6                                          |
| ARPC5   | 1555797_a_at | actin related protein 2/3 complex, subunit 5, 16kDa                |
| ACTG1   | 211983_x_at  | actin, gamma 1                                                     |
| NUMB    | 230462_at    | numb homolog (Drosophila)                                          |
| MYO6    | 203216_s_at  | myosin VI                                                          |
| CSNK2A2 | 224922_at    | casein kinase 2, alpha prime polypeptide                           |
| RAB5C   | 201140_s_at  | RAB5C, member RAS oncogene family                                  |
| CSNK2B  | 231777_at    | Isoform 1 of Lymphocyte antigen 6 complex locus protein G5b        |
| SNX9    | 223027_at    | sorting nexin 9                                                    |
| CDC42   | 208728_s_at  | cell division cycle 42 (GTP binding protein, 25kDa)                |
| PPP3CB  | 202432_at    | protein phosphatase 3, catalytic subunit, beta isozyme             |
| TSG101  | 201758_at    | tumor susceptibility gene 101                                      |
| PPP3CC  | 207000_s_at  | protein phosphatase 3, catalytic subunit, gamma isozyme            |
| SH3GLB1 | 209091_s_at  | SH3-domain GRB2-like endophilin B1                                 |
| CLTCL1  | 205944_s_at  | clathrin, heavy chain-like 1                                       |
| DNM2    | 202253_s_at  | dynamamin 2                                                        |
| CSNK2A1 | 212075_s_at  | casein kinase 2, alpha 1 polypeptide                               |
| ACTR2   | 200727_s_at  | ARP2 actin-related protein 2 homolog (yeast)                       |
| EPS15   | 234278_at    | epidermal growth factor receptor pathway substrate 15              |
| FGF1    | 208240_s_at  | fibroblast growth factor 1 (acidic)                                |
| CLTC    | 210498_at    | clathrin, heavy chain (Hc)                                         |
| ITGB3   | 204627_s_at  | integrin, beta 3 (platelet glycoprotein IIIa, antigen CD61)        |

#### Integrin Signaling

|        |             |                                      |
|--------|-------------|--------------------------------------|
| CAPN6  | 202965_s_at | calpain 6                            |
| MYL5   | 205145_s_at | myosin, light chain 5, regulatory    |
| ACTA2  | 243140_at   | actin, alpha 2, smooth muscle, aorta |
| TSPAN2 | 227236_at   | tetraspanin 2                        |
| ITGA6  | 201656_at   | integrin, alpha 6                    |
| ARF1   | 232175_at   | ADP-ribosylation factor 1            |
| RHOB   | 212099_at   | ras homolog gene family, member B    |



|        |              |                                                             |
|--------|--------------|-------------------------------------------------------------|
| PTK2   | 1559529_at   | PTK2 protein tyrosine kinase 2                              |
| FYN    | 210105_s_at  | FYN oncogene related to SRC, FGR, YES                       |
| RAP2B  | 213923_at    | RAP2B, member of RAS oncogene family                        |
| RHOJ   | 238905_at    | ras homolog gene family, member J                           |
| PLCG1  | 202789_at    | phospholipase C, gamma 1                                    |
| RHOC   | 200885_at    | ras homolog gene family, member C                           |
| WIPF1  | 202664_at    | WAS/WASL interacting protein family, member 1               |
| ITGA10 | 206766_at    | integrin, alpha 10                                          |
| ACTB   | 213867_x_at  | actin, beta                                                 |
| ARF6   | 224788_at    | ADP-ribosylation factor 6                                   |
| TLN1   | 203254_s_at  | talin 1                                                     |
| ARPC5  | 1555797_a_at | actin related protein 2/3 complex, subunit 5, 16kDa         |
| ACTG1  | 211983_x_at  | actin, gamma 1                                              |
| RAP1B  | 200833_s_at  | RAP1B, member of RAS oncogene family                        |
| ASAP1  | 224791_at    | ASAP1 intronic transcript 1 (non-protein coding)            |
| PTEN   | 233254_x_at  | phosphatase and tensin homolog                              |
| PARVA  | 1563458_at   | parvin, alpha                                               |
| FNBP1  | 212288_at    | formin binding protein 1                                    |
| CDC42  | 208728_s_at  | cell division cycle 42 (GTP binding protein, 25kDa)         |
| MAP2K4 | 203266_s_at  | mitogen-activated protein kinase kinase 4                   |
| RHOT2  | 221789_x_at  | ras homolog gene family, member T2                          |
| MAP2K2 | 202424_at    | mitogen-activated protein kinase kinase 2                   |
| MAPK3  | 212046_x_at  | mitogen-activated protein kinase 3                          |
| ACTR2  | 200727_s_at  | ARP2 actin-related protein 2 homolog (yeast)                |
| AKT2   | 236664_at    | v-akt murine thymoma viral oncogene homolog 2               |
| ACTN2  | 203863_at    | actinin, alpha 2                                            |
| GSK3B  | 240562_at    | Isoform 1 of Glycogen synthase kinase-3 beta                |
| ITGB3  | 204627_s_at  | integrin, beta 3 (platelet glycoprotein IIIa, antigen CD61) |

#### Protein Ubiquitination Pathway

|         |              |                                                                                |
|---------|--------------|--------------------------------------------------------------------------------|
| USP9X   | 230543_at    | ubiquitin specific peptidase 9, X-linked                                       |
| HSPA6   | 213418_at    | heat shock 70kDa protein 6 (HSP70B')                                           |
| PSMB9   | 1555853_at   | proteasome (prosome, macropain) subunit, beta type, 9 (large multifunctional p |
| HSPA13  | 202558_s_at  | heat shock protein 70kDa family, member 13                                     |
| NEDD4L  | 212448_at    | neural precursor cell expressed, developmentally down-regulated 4-like         |
| VHL     | 1559227_s_at | von Hippel-Lindau tumor suppressor                                             |
| HSPB11  | 203960_s_at  | heat shock protein family B (small), member 11                                 |
| DNAJC18 | 238115_at    | Homo sapiens DnaJ (Hsp40) homolog, subfamily C, member 18                      |
| PSMD10  | 1554577_a_at | proteasome (prosome, macropain) 26S subunit, non-ATPase, 10                    |
| USP1    | 202413_s_at  | ubiquitin specific peptidase 1                                                 |
| CDC23   | 202892_at    | cell division cycle 23 homolog (S. cerevisiae)                                 |
| PSMB1   | 200876_s_at  | proteasome (prosome, macropain) subunit, beta type, 1                          |
| RBX1    | 218117_at    | ring-box 1, E3 ubiquitin protein ligase                                        |
| UBE2N   | 201523_x_at  | ubiquitin-conjugating enzyme E2N (UBC13 homolog, yeast)                        |
| PSMD6   | 202753_at    | proteasome (prosome, macropain) 26S subunit, non-ATPase, 6                     |
| PSMD12  | 202353_s_at  | proteasome (prosome, macropain) 26S subunit, non-ATPase, 12                    |
| UBE2A   | 201898_s_at  | ubiquitin-conjugating enzyme E2A (RAD6 homolog)                                |
| CUL2    | 203079_s_at  | cullin 2                                                                       |

|          |             |                                                                            |
|----------|-------------|----------------------------------------------------------------------------|
| CDC34    | 212540_at   | cell division cycle 34 homolog ( <i>S. cerevisiae</i> )                    |
| PSMD9    | 207805_s_at | proteasome (prosome, macropain) 26S subunit, non-ATPase, 9                 |
| UBA1     | 200964_at   | ubiquitin-like modifier activating enzyme 1                                |
| TCEB1    | 202824_s_at | transcription elongation factor B (SIII), polypeptide 1 (15kDa, elongin C) |
| PSMB2    | 200039_s_at | proteasome (prosome, macropain) subunit, beta type, 2                      |
| DNAJC7   | 202416_at   | DnaJ (Hsp40) homolog, subfamily C, member 7                                |
| HSP90AB1 | 200064_at   | heat shock protein 90kDa alpha (cytosolic), class B member 1               |
| PSMC2    | 201067_at   | proteasome (prosome, macropain) 26S subunit, ATPase, 2                     |
| PSMB5    | 208799_at   | proteasome (prosome, macropain) subunit, beta type, 5                      |
| XIAP     | 235222_x_at | X-linked inhibitor of apoptosis                                            |
| SUGT1    | 224309_s_at | SGT1, suppressor of G2 allele of SKP1 ( <i>S. cerevisiae</i> )             |
| UBE2M    | 203109_at   | ubiquitin-conjugating enzyme E2M (UBC12 homolog, yeast)                    |
| PSMD4    | 211609_x_at | proteasome (prosome, macropain) 26S subunit, non-ATPase, 4                 |
| DNAJC24  | 213853_at   | DnaJ (Hsp40) homolog, subfamily C, member 24                               |
| PSMD3    | 201388_at   | proteasome (prosome, macropain) 26S subunit, non-ATPase, 3                 |
| USP2     | 207213_s_at | ubiquitin specific peptidase 2                                             |
| HSPA9    | 200690_at   | heat shock 70kDa protein 9 (mortalin)                                      |
| USP16    | 222616_s_at | ubiquitin specific peptidase 16                                            |
| PSMD1    | 201198_s_at | proteasome (prosome, macropain) 26S subunit, non-ATPase, 1                 |
| DNAJB6   | 209015_s_at | DnaJ (Hsp40) homolog, subfamily B, member 6                                |
| USP37    | 232033_at   | ubiquitin specific peptidase 37                                            |
| DNAJC28  | 220372_at   | DnaJ (Hsp40) homolog, subfamily C, member 28                               |
| BAG1     | 202387_at   | BCL2-associated athanogene                                                 |
| UBR2     | 215558_at   | ubiquitin protein ligase E3 component n-recognin 2                         |
| USP54    | 227334_at   | ubiquitin specific peptidase 54                                            |
