# Supplementary material for: Molecular signatures of differential responses to exercise trainings during rehabilitation
Source: PubMed Central journal article supplement (PMC5568829; doi:10.15761/bgg.1000127), 2017-04-10
Supplement: NIHMS888767-supplement-Table_S2.pdf [file NIHMS888767-supplement-Table_S2.pdf]

**Table S2****pre-rehab vs. control**

| <b>Gene</b>                           | <b>Affymetrix accession #</b> | <b>Gene description</b>                                                    |
|---------------------------------------|-------------------------------|----------------------------------------------------------------------------|
| <b>GM-CSF Signaling</b>               |                               |                                                                            |
| AKT3                                  | 242876_at                     | v-akt murine thymoma viral oncogene homolog 3 (protein kinase B, gamma)    |
| PIK3CD                                | 203879_at                     | phosphoinositide-3-kinase, catalytic, delta polypeptide                    |
| ETS1                                  | 224833_at                     | v-ets erythroblastosis virus E26 oncogene homolog 1 (avian)                |
| STAT1                                 | HUMISGF3A/M97935_3_at         | signal transducer and activator of transcription 1, 91kDa                  |
| LYN                                   | 202626_s_at                   | v-yes-1 Yamaguchi sarcoma viral related oncogene homolog                   |
| SOS1                                  | 212780_at                     | son of sevenless homolog 1 (Drosophila)                                    |
| KRAS                                  | 204009_s_at                   | v-Ki-ras2 Kirsten rat sarcoma viral oncogene homolog                       |
| GNB2L1                                | 200651_at                     | guanine nucleotide binding protein (G protein), beta polypeptide 2-like 1  |
| MAP2K2                                | 213490_s_at                   | mitogen-activated protein kinase kinase 2                                  |
| AKT2                                  | 225471_s_at                   | v-akt murine thymoma viral oncogene homolog 2                              |
| CAMK2G                                | 212757_s_at                   | calcium/calmodulin-dependent protein kinase II gamma                       |
| CAMK2B                                | 211483_x_at                   | calcium/calmodulin-dependent protein kinase II beta                        |
| MAPK1                                 | 208351_s_at                   | mitogen-activated protein kinase 1                                         |
| PIK3R2                                | 207105_s_at                   | phosphoinositide-3-kinase, regulatory subunit 2 (beta)                     |
| ATM                                   | 1553387_at                    | ataxia telangiectasia mutated                                              |
| <b>Protein Ubiquitination Pathway</b> |                               |                                                                            |
| USP6                                  | 1555063_at                    | ubiquitin specific peptidase 6 (Tre-2 oncogene)                            |
| USP53                                 | 237465_at                     | ubiquitin specific peptidase 53                                            |
| DNAJB8                                | 237284_at                     | DnaJ (Hsp40) homolog, subfamily B, member 8                                |
| HSPA13                                | 202557_at                     | heat shock protein 70kDa family, member 13                                 |
| XIAP                                  | 206536_s_at                   | X-linked inhibitor of apoptosis                                            |
| DNAJC21                               | 230893_at                     | DnaJ (Hsp40) homolog, subfamily C, member 21                               |
| ANAPC10                               | 241959_at                     | anaphase promoting complex subunit 10                                      |
| DNAJB14                               | 222850_s_at                   | DnaJ (Hsp40) homolog, subfamily B, member 14                               |
| SUGT1                                 | 224309_s_at                   | SGT1, suppressor of G2 allele of SKP1 (S. cerevisiae)                      |
| USP16                                 | 228822_s_at                   | ubiquitin specific peptidase 16                                            |
| USP1                                  | 202412_s_at                   | ubiquitin specific peptidase 1                                             |
| UBE2V2                                | 209096_at                     | ubiquitin-conjugating enzyme E2 variant 2                                  |
| UBE2N                                 | 212751_at                     | ubiquitin-conjugating enzyme E2N (UBC13 homolog, yeast)                    |
| USP9X                                 | 201099_at                     | ubiquitin specific peptidase 9, X-linked                                   |
| PSMD6                                 | 202753_at                     | proteasome (prosome, macropain) 26S subunit, non-ATPase, 6                 |
| BAP1                                  | 1555735_a_at                  | BRCA1 associated protein-1 (ubiquitin carboxy-terminal hydrolase)          |
| PSME1                                 | 200814_at                     | proteasome (prosome, macropain) activator subunit 1 (PA28 alpha)           |
| USP48                                 | 220079_s_at                   | ubiquitin specific peptidase 48                                            |
| PSMA2                                 | 201316_at                     | proteasome (prosome, macropain) subunit, alpha type, 2                     |
| UBE2B                                 | 239163_at                     | ubiquitin-conjugating enzyme E2B (RAD6 homolog)                            |
| PSMB5                                 | 208799_at                     | proteasome (prosome, macropain) subunit, beta type, 5                      |
| PSMD3                                 | 201388_at                     | proteasome (prosome, macropain) 26S subunit, non-ATPase, 3                 |
| USP21                                 | 218367_x_at                   | ubiquitin specific peptidase 21                                            |
| TCEB2                                 | 200085_s_at                   | transcription elongation factor B (SIII), polypeptide 2 (18kDa, elongin B) |
| UBE2R2                                | 223014_at                     | ubiquitin-conjugating enzyme E2R 2                                         |

|                         |             |                                                                                                 |
|-------------------------|-------------|-------------------------------------------------------------------------------------------------|
| DNAJC18                 | 238115_at   | DnaJ (Hsp40) homolog, subfamily C, member 18                                                    |
| STUB1                   | 217934_x_at | STIP1 homology and U-box containing protein 1, E3 ubiquitin protein ligase                      |
| HSPA14                  | 219212_at   | heat shock 70kDa protein 14                                                                     |
| DNAJC24                 | 213853_at   | DnaJ (Hsp40) homolog, subfamily C, member 24                                                    |
| DNAJC7                  | 202416_at   | DnaJ (Hsp40) homolog, subfamily C, member 7                                                     |
| USP19                   | 214674_at   | ubiquitin specific peptidase 19                                                                 |
| UBE2D4                  | 221949_at   | ubiquitin-conjugating enzyme E2D 4 (putative)                                                   |
| USP27X                  | 217605_at   | ubiquitin specific peptidase 27, X-linked                                                       |
| PARK2                   | 207058_s_at | parkinson protein 2, E3 ubiquitin protein ligase (parkin)                                       |
| PSMB2                   | 201404_x_at | proteasome (prosome, macropain) subunit, beta type, 2                                           |
| NRAS                    | 202647_s_at | neuroblastoma RAS viral (v-ras) oncogene homolog                                                |
| CAMK2B                  | 213276_at   | calcium/calmodulin-dependent protein kinase II beta                                             |
| PPP3CB                  | 202432_at   | protein phosphatase 3, catalytic subunit, beta isozyme                                          |
| MAPK3                   | 212046_x_at | mitogen-activated protein kinase 3                                                              |
| MAP2K2                  | 202424_at   | mitogen-activated protein kinase kinase 2                                                       |
| Glioma Signaling        |             |                                                                                                 |
| AKT3                    | 242876_at   | v-akt murine thymoma viral oncogene homolog 3 (protein kinase B, gamma)                         |
| PIK3CD                  | 203879_at   | phosphoinositide-3-kinase, catalytic, delta polypeptide                                         |
| PRKCI                   | 213518_at   | protein kinase C, iota                                                                          |
| IGF1R                   | 203628_at   | insulin-like growth factor 1 receptor                                                           |
| SOS1                    | 212780_at   | son of sevenless homolog 1 (Drosophila)                                                         |
| KRAS                    | 204009_s_at | v-Ki-ras2 Kirsten rat sarcoma viral oncogene homolog                                            |
| CALM1 (includes others) | 200653_s_at | calmodulin 1 (phosphorylase kinase, delta)                                                      |
| PDGFRA                  | 203131_at   | platelet-derived growth factor receptor, alpha polypeptide                                      |
| PDGFB                   | 216061_x_at | platelet-derived growth factor beta polypeptide (simian sarcoma viral (v-sis) oncogene homolog) |
| MAP2K2                  | 213490_s_at | mitogen-activated protein kinase kinase 2                                                       |
| AKT2                    | 225471_s_at | v-akt murine thymoma viral oncogene homolog 2                                                   |
| CAMK2G                  | 212757_s_at | calcium/calmodulin-dependent protein kinase II gamma                                            |
| CAMK2B                  | 211483_x_at | calcium/calmodulin-dependent protein kinase II beta                                             |
| MAPK1                   | 208351_s_at | mitogen-activated protein kinase 1                                                              |
| CAMK1                   | 1558556_at  | calcium/calmodulin-dependent protein kinase I                                                   |
| CDKN2C                  | 211792_s_at | cyclin-dependent kinase inhibitor 2C (p18, inhibits CDK4)                                       |
| PIK3R2                  | 207105_s_at | phosphoinositide-3-kinase, regulatory subunit 2 (beta)                                          |
| ATM                     | 1553387_at  | ataxia telangiectasia mutated                                                                   |
| FAK Signaling           |             |                                                                                                 |
| AKT3                    | 242876_at   | v-akt murine thymoma viral oncogene homolog 3 (protein kinase B, gamma)                         |
| PIK3CD                  | 203879_at   | phosphoinositide-3-kinase, catalytic, delta polypeptide                                         |
| PAK3                    | 214607_at   | p21 protein (Cdc42/Rac)-activated kinase 3                                                      |
| PTK2                    | 241453_at   | PTK2 protein tyrosine kinase 2                                                                  |
| FYN                     | 212486_s_at | FYN oncogene related to SRC, FGR, YES                                                           |
| SOS1                    | 212780_at   | son of sevenless homolog 1 (Drosophila)                                                         |
| KRAS                    | 204009_s_at | v-Ki-ras2 Kirsten rat sarcoma viral oncogene homolog                                            |
| WAS                     | 38964_r_at  | Wiskott-Aldrich syndrome (eczema-thrombocytopenia)                                              |
| MAP2K2                  | 213490_s_at | mitogen-activated protein kinase kinase 2                                                       |
| AKT2                    | 225471_s_at | v-akt murine thymoma viral oncogene homolog 2                                                   |

|                 |             |                                                                           |
|-----------------|-------------|---------------------------------------------------------------------------|
| ACTA1           | 203872_at   | actin, alpha 1, skeletal muscle                                           |
| CAPN1           | 200752_s_at | calpain 1, (mu/I) large subunit                                           |
| MAPK1           | 208351_s_at | mitogen-activated protein kinase 1                                        |
| PAK2            | 208876_s_at | p21 protein (Cdc42/Rac)-activated kinase 2                                |
| PIK3R2          | 207105_s_at | phosphoinositide-3-kinase, regulatory subunit 2 (beta)                    |
| CAPN8           | 229030_at   | calpain 8                                                                 |
| ATM             | 1553387_at  | ataxia telangiectasia mutated                                             |
|                 |             |                                                                           |
| CXCR4 Signaling |             |                                                                           |
| AKT3            | 242876_at   | v-akt murine thymoma viral oncogene homolog 3 (protein kinase B, gamma)   |
| RHOJ            | 243481_at   | ras homolog gene family, member J                                         |
| PIK3CD          | 203879_at   | phosphoinositide-3-kinase, catalytic, delta polypeptide                   |
| ROCK2           | 211504_x_at | Rho-associated, coiled-coil containing protein kinase 2                   |
| GNAQ            | 224862_at   | guanine nucleotide binding protein (G protein), q polypeptide             |
| PAK3            | 214607_at   | p21 protein (Cdc42/Rac)-activated kinase 3                                |
| PRKCI           | 213518_at   | protein kinase C, iota                                                    |
| PTK2            | 241453_at   | PTK2 protein tyrosine kinase 2                                            |
| LYN             | 202626_s_at | v-yes-1 Yamaguchi sarcoma viral related oncogene homolog                  |
| KRAS            | 204009_s_at | v-Ki-ras2 Kirsten rat sarcoma viral oncogene homolog                      |
| GNB2L1          | 200651_at   | guanine nucleotide binding protein (G protein), beta polypeptide 2-like 1 |
| MYL2            | 209742_s_at | myosin, light chain 2, regulatory, cardiac, slow                          |
| MAP2K2          | 213490_s_at | mitogen-activated protein kinase kinase 2                                 |
| GNAS            | 200780_x_at | GNAS complex locus                                                        |
| AKT2            | 225471_s_at | v-akt murine thymoma viral oncogene homolog 2                             |
| GNA11           | 204248_at   | guanine nucleotide binding protein (G protein), alpha 11 (Gq class)       |
| MYL12B          | 221474_at   | myosin, light chain 12B, regulatory                                       |
| RHOQ            | 212119_at   | ras homolog gene family, member Q                                         |
| MYL4            | 210395_x_at | myosin, light chain 4, alkali; atrial, embryonic                          |
| MAPK1           | 208351_s_at | mitogen-activated protein kinase 1                                        |
| PAK2            | 208876_s_at | p21 protein (Cdc42/Rac)-activated kinase 2                                |
| MYL6B           | 204173_at   | myosin, light chain 6B, alkali, smooth muscle and non-muscle              |
| PIK3R2          | 207105_s_at | phosphoinositide-3-kinase, regulatory subunit 2 (beta)                    |
| ATM             | 1553387_at  | ataxia telangiectasia mutated                                             |

### 3 wks rehab vs. control

| <b>Gene</b> | <b>Affymetrix accession #</b> | <b>Gene description</b>                                                                  |
|-------------|-------------------------------|------------------------------------------------------------------------------------------|
|             |                               | Mitochondrial Dysfunction                                                                |
| CASP3       | 202763_at                     | caspase 3, apoptosis-related cysteine peptidase                                          |
| UCP2        | 208998_at                     | uncoupling protein 2 (mitochondrial, proton carrier)                                     |
| PSEN1       | 203460_s_at                   | presenilin 1                                                                             |
| COX15       | 221550_at                     | COX15 homolog, cytochrome c oxidase assembly protein (yeast)                             |
| APH1A       | 218389_s_at                   | anterior pharynx defective 1 homolog A (C. elegans)                                      |
| ATP5C1      | 205711_x_at                   | ATP synthase, H <sup>+</sup> transporting, mitochondrial F1 complex, gamma polypeptide 1 |
| MT-COI      | 1553538_s_at                  | cytochrome c oxidase subunit I, Mitochondrion [Homo sapiens]                             |
| MT-CO2      | 1553570_x_at                  | mitochondrially encoded cytochrome c oxidase II                                          |
| COX7B       | 202110_at                     | cytochrome c oxidase subunit VIIb                                                        |
| NDUFB9      | 222992_s_at                   | NADH dehydrogenase (ubiquinone) 1 beta subcomplex, 9, 22kDa                              |
| COX7C       | 201134_x_at                   | cytochrome c oxidase subunit VIIc                                                        |
| NDUFS4      | 209303_at                     | NADH dehydrogenase (ubiquinone) Fe-S protein 4, 18kDa (NADH-coenzyme Q reductase)        |
| SDHB        | 214166_at                     | succinate dehydrogenase complex, subunit B, iron sulfur (Ip)                             |
| NDUFB8      | 201227_s_at                   | NADH dehydrogenase (ubiquinone) 1 beta subcomplex, 8, 19kDa                              |
| NDUFA2      | 209224_s_at                   | NADH dehydrogenase (ubiquinone) 1 alpha subcomplex, 2, 8kDa                              |
| NDUFS6      | 203606_at                     | NADH dehydrogenase (ubiquinone) Fe-S protein 6, 13kDa (NADH-coenzyme Q reductase)        |
| NDUFB2      | 218200_s_at                   | NADH dehydrogenase (ubiquinone) 1 beta subcomplex, 2, 8kDa                               |
| NDUFB4      | 218226_s_at                   | NADH dehydrogenase (ubiquinone) 1 beta subcomplex, 4, 15kDa                              |
| NDUFA13     | 220864_s_at                   | NADH dehydrogenase (ubiquinone) 1 alpha subcomplex, 13                                   |
| NDUFA6      | 202000_at                     | NADH dehydrogenase (ubiquinone) 1 alpha subcomplex, 6, 14kDa                             |
| NDUFB6      | 203613_s_at                   | NADH dehydrogenase (ubiquinone) 1 beta subcomplex, 6, 17kDa                              |
| TXN2        | 209077_at                     | thioredoxin 2                                                                            |
| UQCRC1      | 201903_at                     | ubiquinol-cytochrome c reductase core protein I                                          |
| NDUFA3      | 218563_at                     | NADH dehydrogenase (ubiquinone) 1 alpha subcomplex, 3, 9kDa                              |
| NDUFA11     | 228690_s_at                   | NADH dehydrogenase (ubiquinone) 1 alpha subcomplex, 11, 14.7kDa                          |
| NDUFA12     | 223244_s_at                   | NADH dehydrogenase (ubiquinone) 1 alpha subcomplex, 12                                   |
| COX5A       | 203663_s_at                   | cytochrome c oxidase subunit Va                                                          |
| COX5B       | 202343_x_at                   | cytochrome c oxidase subunit Vb                                                          |
| NDUFB1      | 206790_s_at                   | NADH dehydrogenase (ubiquinone) 1 beta subcomplex, 1, 7kDa                               |
| COX8A       | 201119_s_at                   | cytochrome c oxidase subunit VIIIA (ubiquitous)                                          |
| HTRA2       | 203089_s_at                   | HtrA serine peptidase 2                                                                  |
| COX4I1      | 202698_x_at                   | cytochrome c oxidase subunit IV isoform 1                                                |
| NDUFA8      | 218160_at                     | NADH dehydrogenase (ubiquinone) 1 alpha subcomplex, 8, 19kDa                             |
| CYCS        | 229415_at                     | cytochrome c, somatic                                                                    |
| COX7A1      | 204570_at                     | cytochrome c oxidase subunit VIIa polypeptide 1 (muscle)                                 |
| NDUFB11     | 218320_s_at                   | NADH dehydrogenase (ubiquinone) 1 beta subcomplex, 11, 17.3kDa                           |
| COX6B1      | 201441_at                     | cytochrome c oxidase subunit VIb polypeptide 1 (ubiquitous)                              |
| UQCRC2      | 241755_at                     | ubiquinol-cytochrome c reductase core protein II                                         |
| NDUFS7      | 211752_s_at                   | NADH dehydrogenase (ubiquinone) Fe-S protein 7, 20kDa (NADH-coenzyme Q reductase)        |
| SDHC        | 216591_s_at                   | succinate dehydrogenase complex, subunit C, integral membrane protein, 15kDa             |
| NDUFB10     | 223112_s_at                   | NADH dehydrogenase (ubiquinone) 1 beta subcomplex, 10, 22kDa                             |
| COX6A2      | 206353_at                     | cytochrome c oxidase subunit VIa polypeptide 2                                           |
| NDUFS1      | 235321_at                     | NADH dehydrogenase (ubiquinone) Fe-S protein 1, 75kDa (NADH-coenzyme Q reductase)        |
| NDUFS8      | 203190_at                     | NADH dehydrogenase (ubiquinone) Fe-S protein 8, 23kDa (NADH-coenzyme Q reductase)        |

|                           |              |                                                                                   |
|---------------------------|--------------|-----------------------------------------------------------------------------------|
| PARK2                     | 207058_s_at  | parkinson protein 2, E3 ubiquitin protein ligase (parkin)                         |
| Oxidative Phosphorylation |              |                                                                                   |
| COX15                     | 221550_at    | COX15 homolog, cytochrome c oxidase assembly protein (yeast)                      |
| ATP6V1C1                  | 226463_at    | ATPase, H+ transporting, lysosomal 42kDa, V1 subunit C1                           |
| ATP5C1                    | 205711_x_at  | ATP synthase, H+ transporting, mitochondrial F1 complex, gamma polypeptide 1      |
| MT-COI                    | 1553538_s_at | cytochrome c oxidase subunit I, Mitochondrion [Homo sapiens]                      |
| MT-CO2                    | 1553570_x_at | mitochondrially encoded cytochrome c oxidase II                                   |
| COX7B                     | 202110_at    | cytochrome c oxidase subunit VIIb                                                 |
| NDUFB9                    | 222992_s_at  | NADH dehydrogenase (ubiquinone) 1 beta subcomplex, 9, 22kDa                       |
| COX7C                     | 201134_x_at  | cytochrome c oxidase subunit VIIc                                                 |
| NDUFS4                    | 209303_at    | NADH dehydrogenase (ubiquinone) Fe-S protein 4, 18kDa (NADH-coenzyme Q reductase) |
| SDHB                      | 214166_at    | succinate dehydrogenase complex, subunit B, iron sulfur (Ip)                      |
| NDUFC2                    | 218101_s_at  | NADH dehydrogenase (ubiquinone) 1, subcomplex unknown, 2, 14.5kDa                 |
| NDUFB8                    | 201227_s_at  | NADH dehydrogenase (ubiquinone) 1 beta subcomplex, 8, 19kDa                       |
| ATP5G2                    | 208764_s_at  | ATP synthase, H+ transporting, mitochondrial Fo complex, subunit C2 (subunit 9)   |
| NDUFA2                    | 209224_s_at  | NADH dehydrogenase (ubiquinone) 1 alpha subcomplex, 2, 8kDa                       |
| NDUFS6                    | 203606_at    | NADH dehydrogenase (ubiquinone) Fe-S protein 6, 13kDa (NADH-coenzyme Q reductase) |
| NDUFB2                    | 218200_s_at  | NADH dehydrogenase (ubiquinone) 1 beta subcomplex, 2, 8kDa                        |
| NDUFB4                    | 218226_s_at  | NADH dehydrogenase (ubiquinone) 1 beta subcomplex, 4, 15kDa                       |
| UQCR10                    | 218190_s_at  | ubiquinol-cytochrome c reductase, complex III subunit X                           |
| NDUFA13                   | 220864_s_at  | NADH dehydrogenase (ubiquinone) 1 alpha subcomplex, 13                            |
| NDUFA6                    | 202000_at    | NADH dehydrogenase (ubiquinone) 1 alpha subcomplex, 6, 14kDa                      |
| NDUFB6                    | 203613_s_at  | NADH dehydrogenase (ubiquinone) 1 beta subcomplex, 6, 17kDa                       |
| UQCRC1                    | 201903_at    | ubiquinol-cytochrome c reductase core protein I                                   |
| NDUFA3                    | 218563_at    | NADH dehydrogenase (ubiquinone) 1 alpha subcomplex, 3, 9kDa                       |
| NDUFA11                   | 228690_s_at  | NADH dehydrogenase (ubiquinone) 1 alpha subcomplex, 11, 14.7kDa                   |
| NDUFA12                   | 223244_s_at  | NADH dehydrogenase (ubiquinone) 1 alpha subcomplex, 12                            |
| COX5A                     | 203663_s_at  | cytochrome c oxidase subunit Va                                                   |
| COX5B                     | 202343_x_at  | cytochrome c oxidase subunit Vb                                                   |
| ATP5L                     | 207573_x_at  | ATP synthase, H+ transporting, mitochondrial Fo complex, subunit G                |
| NDUFB1                    | 206790_s_at  | NADH dehydrogenase (ubiquinone) 1 beta subcomplex, 1, 7kDa                        |
| COX8A                     | 201119_s_at  | cytochrome c oxidase subunit VIIIA (ubiquitous)                                   |
| COX4I1                    | 202698_x_at  | cytochrome c oxidase subunit IV isoform 1                                         |
| ATP5F1                    | 243501_at    | ATP synthase, H+ transporting, mitochondrial Fo complex, subunit B1               |
| NDUFA8                    | 218160_at    | NADH dehydrogenase (ubiquinone) 1 alpha subcomplex, 8, 19kDa                      |
| COX7A1                    | 204570_at    | cytochrome c oxidase subunit VIIa polypeptide 1 (muscle)                          |
| NDUFB11                   | 218320_s_at  | NADH dehydrogenase (ubiquinone) 1 beta subcomplex, 11, 17.3kDa                    |
| COX6B1                    | 201441_at    | cytochrome c oxidase subunit VIb polypeptide 1 (ubiquitous)                       |
| ATP5H                     | 210149_s_at  | ATP synthase, H+ transporting, mitochondrial Fo complex, subunit d                |
| UQCRC2                    | 241755_at    | ubiquinol-cytochrome c reductase core protein II                                  |
| NDUFS7                    | 211752_s_at  | NADH dehydrogenase (ubiquinone) Fe-S protein 7, 20kDa (NADH-coenzyme Q reductase) |
| SDHC                      | 216591_s_at  | succinate dehydrogenase complex, subunit C, integral membrane protein, 15kDa      |
| NDUFB10                   | 223112_s_at  | NADH dehydrogenase (ubiquinone) 1 beta subcomplex, 10, 22kDa                      |
| COX6A2                    | 206353_at    | cytochrome c oxidase subunit VIa polypeptide 2                                    |
| NDUFS1                    | 235321_at    | NADH dehydrogenase (ubiquinone) Fe-S protein 1, 75kDa (NADH-coenzyme Q reductase) |
| NDUFS8                    | 203190_at    | NADH dehydrogenase (ubiquinone) Fe-S protein 8, 23kDa (NADH-coenzyme Q reductase) |

## Actin Cytoskeleton Signaling

|               |             |                                                                                              |
|---------------|-------------|----------------------------------------------------------------------------------------------|
| ITGA4         | 213416_at   | integrin, alpha 4 (antigen CD49D, alpha 4 subunit of VLA-4 receptor)                         |
| MYL5          | 205145_s_at | myosin, light chain 5, regulatory                                                            |
| PIK3C2A       | 1569021_at  | phosphoinositide-3-kinase, class 2, alpha polypeptide                                        |
| F2R           | 203989_x_at | coagulation factor II (thrombin) receptor                                                    |
| IQGAP2        | 203474_at   | IQ motif containing GTPase activating protein 2                                              |
| RAC2          | 213603_s_at | ras-related C3 botulinum toxin substrate 2 (rho family, small GTP binding protein Rac2)      |
| PIK3CD        | 203879_at   | phosphoinositide-3-kinase, catalytic, delta polypeptide                                      |
| CD14          | 201743_at   | CD14 molecule                                                                                |
| FGF12         | 207501_s_at | fibroblast growth factor 12                                                                  |
| VAV2          | 226063_at   | vav 2 guanine nucleotide exchange factor                                                     |
| EZR           | 208621_s_at | ezrin                                                                                        |
| PDGFD         | 219304_s_at | platelet derived growth factor D                                                             |
| ACTN1         | 208636_at   | actinin, alpha 1                                                                             |
| CDC42         | 214230_at   | cell division cycle 42 (GTP binding protein, 25kDa)                                          |
| NCKAP1        | 207738_s_at | NCK-associated protein 1                                                                     |
| LIMK2         | 202193_at   | LIM domain kinase 2                                                                          |
| ARPC1B        | 201954_at   | actin related protein 2/3 complex, subunit 1B, 41kDa                                         |
| GNG12         | 212294_at   | guanine nucleotide binding protein (G protein), gamma 12                                     |
| MSN           | 200600_at   | moesin                                                                                       |
| IQGAP1        | 200791_s_at | IQ motif containing GTPase activating protein 1                                              |
| ROCK2         | 211504_x_at | Rho-associated, coiled-coil containing protein kinase 2                                      |
| PFN4          | 235627_at   | profilin family, member 4                                                                    |
| NRAS          | 224985_at   | neuroblastoma RAS viral (v-ras) oncogene homolog                                             |
| TMSB10/TMSB4X | 217733_s_at | thymosin beta 10                                                                             |
| ACTB          | 200801_x_at | actin, beta                                                                                  |
| ARPC2         | 207988_s_at | actin related protein 2/3 complex, subunit 2, 34kDa                                          |
| PAK2          | 208877_at   | p21 protein (Cdc42/Rac)-activated kinase 2                                                   |
| DIAPH2        | 205726_at   | diaphanous homolog 2 (Drosophila)                                                            |
| ACTG1         | 224585_x_at | actin, gamma 1                                                                               |
| WASL          | 224813_at   | Wiskott-Aldrich syndrome-like                                                                |
| MAPK1         | 212271_at   | mitogen-activated protein kinase 1                                                           |
| PPP1CB        | 201407_s_at | protein phosphatase 1, catalytic subunit, beta isozyme                                       |
| WASF2         | 224562_at   | WAS protein family, member 2                                                                 |
| ACTR3         | 200996_at   | ARP3 actin-related protein 3 homolog (yeast)                                                 |
| MYH10         | 213067_at   | myosin, heavy chain 10, non-muscle                                                           |
| CYFIP1        | 208923_at   | cytoplasmic FMR1 interacting protein 1                                                       |
| ACTR2         | 200728_at   | ARP2 actin-related protein 2 homolog (yeast)                                                 |
| APC           | 203525_s_at | adenomatous polyposis coli                                                                   |
| PPP1R12A      | 201602_s_at | protein phosphatase 1, regulatory (inhibitor) subunit 12A                                    |
| PIK3CA        | 204369_at   | phosphoinositide-3-kinase, catalytic, alpha polypeptide                                      |
| ITGB1         | 211945_s_at | integrin, beta 1 (fibronectin receptor, beta polypeptide, antigen CD29 includes MDF2, MSK12) |
| C3orf10       | 224023_s_at | chromosome 3 open reading frame 10                                                           |
| TTN           | 208195_at   | titin                                                                                        |
| MYL2          | 209742_s_at | myosin, light chain 2, regulatory, cardiac, slow                                             |
| PIK3C2B       | 204484_at   | phosphoinositide-3-kinase, class 2, beta polypeptide                                         |
| CRKL          | 212180_at   | v-crk sarcoma virus CT10 oncogene homolog (avian)-like                                       |
| MYH7          | 216265_x_at | myosin, light chain 7, regulatory                                                            |

|        |             |                                                              |
|--------|-------------|--------------------------------------------------------------|
| MYL4   | 210395_x_at | myosin, light chain 4, alkali; atrial, embryonic             |
| MAP2K2 | 213490_s_at | mitogen-activated protein kinase kinase 2                    |
| GNA12  | 221737_at   | guanine nucleotide binding protein (G protein) alpha 12      |
| ABI2   | 216113_at   | abl-interactor 2                                             |
| ACTN2  | 203864_s_at | actinin, alpha 2                                             |
| MYLK3  | 238834_at   | myosin light chain kinase 3                                  |
| MYL6B  | 204173_at   | myosin, light chain 6B, alkali, smooth muscle and non-muscle |
| MYH7B  | 215795_at   | myosin, heavy chain 7B, cardiac muscle, beta                 |

#### Integrin Signaling

|          |             |                                                                                                       |
|----------|-------------|-------------------------------------------------------------------------------------------------------|
| ITGA4    | 213416_at   | integrin, alpha 4 (antigen CD49D, alpha 4 subunit of VLA-4 receptor)                                  |
| MYL5     | 205145_s_at | myosin, light chain 5, regulatory                                                                     |
| CAPN6    | 202965_s_at | calpain 6                                                                                             |
| PIK3C2A  | 1569021_at  | phosphoinositide-3-kinase, class 2, alpha polypeptide                                                 |
| ITGAL    | 213475_s_at | integrin, alpha L (antigen CD11A (p180), lymphocyte function-associated antigen 1; alpha polypeptide) |
| RAC2     | 213603_s_at | ras-related C3 botulinum toxin substrate 2 (rho family, small GTP binding protein Rac2)               |
| PIK3CD   | 203879_at   | phosphoinositide-3-kinase, catalytic, delta polypeptide                                               |
| ITGB2    | 202803_s_at | integrin, beta 2 (complement component 3 receptor 3 and 4 subunit)                                    |
| ITGAM    | 205786_s_at | integrin, alpha M (complement component 3 receptor 3 subunit)                                         |
| WIPF1    | 202664_at   | WAS/WASL interacting protein family, member 1                                                         |
| PTEN     | 211711_s_at | phosphatase and tensin homolog                                                                        |
| RAP2B    | 213923_at   | RAP2B, member of RAS oncogene family                                                                  |
| ACTN1    | 208636_at   | actinin, alpha 1                                                                                      |
| NEDD9    | 202150_s_at | neural precursor cell expressed, developmentally down-regulated 9                                     |
| DIRAS3   | 215506_s_at | DIRAS family, GTP-binding RAS-like 3                                                                  |
| CDC42    | 214230_at   | cell division cycle 42 (GTP binding protein, 25kDa)                                                   |
| FYN      | 210105_s_at | FYN oncogene related to SRC, FGR, YES                                                                 |
| ARPC1B   | 201954_at   | actin related protein 2/3 complex, subunit 1B, 41kDa                                                  |
| RAP1B    | 200833_s_at | RAP1B, member of RAS oncogene family                                                                  |
| ASAP1    | 224791_at   | ArfGAP with SH3 domain, ankyrin repeat and PH domain 1                                                |
| NRAS     | 224985_at   | neuroblastoma RAS viral (v-ras) oncogene homolog                                                      |
| ACTB     | 200801_x_at | actin, beta                                                                                           |
| RHOJ     | 235489_at   | ras homolog gene family, member J                                                                     |
| ARPC2    | 207988_s_at | actin related protein 2/3 complex, subunit 2, 34kDa                                                   |
| CAV1     | 212097_at   | caveolin 1, caveolae protein, 22kDa                                                                   |
| PAK2     | 208877_at   | p21 protein (Cdc42/Rac)-activated kinase 2                                                            |
| ARF3     | 200734_s_at | ADP-ribosylation factor 3                                                                             |
| ACTG1    | 224585_x_at | actin, gamma 1                                                                                        |
| CAPN2    | 208683_at   | calpain 2, (m/II) large subunit                                                                       |
| RHOG     | 203175_at   | ras homolog gene family, member G (rho G)                                                             |
| WASL     | 224813_at   | Wiskott-Aldrich syndrome-like                                                                         |
| MAPK1    | 212271_at   | mitogen-activated protein kinase 1                                                                    |
| PPP1CB   | 201407_s_at | protein phosphatase 1, catalytic subunit, beta isozyme                                                |
| ACTR3    | 200996_at   | ARP3 actin-related protein 3 homolog (yeast)                                                          |
| ITGA6    | 215177_s_at | integrin, alpha 6                                                                                     |
| ACTR2    | 200728_at   | ARP2 actin-related protein 2 homolog (yeast)                                                          |
| PPP1R12A | 201602_s_at | protein phosphatase 1, regulatory (inhibitor) subunit 12A                                             |
| PIK3CA   | 204369_at   | phosphoinositide-3-kinase, catalytic, alpha polypeptide                                               |

|         |             |                                                                                              |
|---------|-------------|----------------------------------------------------------------------------------------------|
| ITGB1   | 211945_s_at | integrin, beta 1 (fibronectin receptor, beta polypeptide, antigen CD29 includes MDF2, MSK12) |
| NCK1    | 211063_s_at | NCK adaptor protein 1                                                                        |
| TTN     | 208195_at   | titin                                                                                        |
| MYL2    | 209742_s_at | myosin, light chain 2, regulatory, cardiac, slow                                             |
| PIK3C2B | 204484_at   | phosphoinositide-3-kinase, class 2, beta polypeptide                                         |
| TSPAN4  | 209264_s_at | tetraspanin 4                                                                                |
| CRKL    | 212180_at   | v-crk sarcoma virus CT10 oncogene homolog (avian)-like                                       |
| MAP2K2  | 213490_s_at | mitogen-activated protein kinase kinase 2                                                    |
| ACTN2   | 203864_s_at | actinin, alpha 2                                                                             |
| MYLK3   | 238834_at   | myosin light chain kinase 3                                                                  |
| GSK3B   | 242336_at   | glycogen synthase kinase 3 beta                                                              |

#### Ubiquinone Biosynthesis

|         |             |                                                                                   |
|---------|-------------|-----------------------------------------------------------------------------------|
| PRMT1   | 206445_s_at | protein arginine methyltransferase 1                                              |
| NDUFB9  | 222992_s_at | NADH dehydrogenase (ubiquinone) 1 beta subcomplex, 9, 22kDa                       |
| NDUFS4  | 209303_at   | NADH dehydrogenase (ubiquinone) Fe-S protein 4, 18kDa (NADH-coenzyme Q reductase) |
| NDUFC2  | 218101_s_at | NADH dehydrogenase (ubiquinone) 1, subcomplex unknown, 2, 14.5kDa                 |
| NDUFB8  | 201227_s_at | NADH dehydrogenase (ubiquinone) 1 beta subcomplex, 8, 19kDa                       |
| NDUFA2  | 209224_s_at | NADH dehydrogenase (ubiquinone) 1 alpha subcomplex, 2, 8kDa                       |
| NDUFS6  | 203606_at   | NADH dehydrogenase (ubiquinone) Fe-S protein 6, 13kDa (NADH-coenzyme Q reductase) |
| NDUFB2  | 218200_s_at | NADH dehydrogenase (ubiquinone) 1 beta subcomplex, 2, 8kDa                        |
| NDUFB4  | 218226_s_at | NADH dehydrogenase (ubiquinone) 1 beta subcomplex, 4, 15kDa                       |
| NDUFA13 | 220864_s_at | NADH dehydrogenase (ubiquinone) 1 alpha subcomplex, 13                            |
| NDUFA6  | 202000_at   | NADH dehydrogenase (ubiquinone) 1 alpha subcomplex, 6, 14kDa                      |
| NDUFB6  | 203613_s_at | NADH dehydrogenase (ubiquinone) 1 beta subcomplex, 6, 17kDa                       |
| NDUFA3  | 218563_at   | NADH dehydrogenase (ubiquinone) 1 alpha subcomplex, 3, 9kDa                       |
| NDUFA11 | 228690_s_at | NADH dehydrogenase (ubiquinone) 1 alpha subcomplex, 11, 14.7kDa                   |
| NDUFA12 | 223244_s_at | NADH dehydrogenase (ubiquinone) 1 alpha subcomplex, 12                            |
| NDUFB1  | 206790_s_at | NADH dehydrogenase (ubiquinone) 1 beta subcomplex, 1, 7kDa                        |
| NDUFA8  | 218160_at   | NADH dehydrogenase (ubiquinone) 1 alpha subcomplex, 8, 19kDa                      |
| NDUFB11 | 218320_s_at | NADH dehydrogenase (ubiquinone) 1 beta subcomplex, 11, 17.3kDa                    |
| NDUFS7  | 211752_s_at | NADH dehydrogenase (ubiquinone) Fe-S protein 7, 20kDa (NADH-coenzyme Q reductase) |
| NDUFB10 | 223112_s_at | NADH dehydrogenase (ubiquinone) 1 beta subcomplex, 10, 22kDa                      |
| NDUFS1  | 235321_at   | NADH dehydrogenase (ubiquinone) Fe-S protein 1, 75kDa (NADH-coenzyme Q reductase) |
| NDUFS8  | 203190_at   | NADH dehydrogenase (ubiquinone) Fe-S protein 8, 23kDa (NADH-coenzyme Q reductase) |



**6 wks rehab vs. control**

| <b>Gene</b>                      | <b>Affymetrix accession #</b> | <b>Gene description</b>                                                                  |
|----------------------------------|-------------------------------|------------------------------------------------------------------------------------------|
| <b>Mitochondrial Dysfunction</b> |                               |                                                                                          |
| COX11                            | 214277_at                     | COX11 cytochrome c oxidase assembly homolog (yeast)                                      |
| LRRK2                            | 229584_at                     | leucine-rich repeat kinase 2                                                             |
| APP                              | 200602_at                     | amyloid beta (A4) precursor protein                                                      |
| MAPK8                            | 229664_at                     | mitogen-activated protein kinase 8                                                       |
| PINK1                            | 209019_s_at                   | PTEN induced putative kinase 1                                                           |
| PSEN1                            | 203460_s_at                   | presenilin 1                                                                             |
| TXNRD2                           | 211177_s_at                   | thioredoxin reductase 2                                                                  |
| NDUFA12                          | 223244_s_at                   | NADH dehydrogenase (ubiquinone) 1 alpha subcomplex, 12                                   |
| NDUFB1                           | 206790_s_at                   | NADH dehydrogenase (ubiquinone) 1 beta subcomplex, 1, 7kDa                               |
| NDUFA13                          | 220864_s_at                   | NADH dehydrogenase (ubiquinone) 1 alpha subcomplex, 13                                   |
| ATP5C1                           | 205711_x_at                   | ATP synthase, H <sup>+</sup> transporting, mitochondrial F1 complex, gamma polypeptide 1 |
| NDUFB10                          | 223112_s_at                   | NADH dehydrogenase (ubiquinone) 1 beta subcomplex, 10, 22kDa                             |
| FIS1                             | 218034_at                     | fission 1 (mitochondrial outer membrane) homolog ( <i>S. cerevisiae</i> )                |
| NDUFB8                           | 214241_at                     | NADH dehydrogenase (ubiquinone) 1 beta subcomplex, 8, 19kDa                              |
| NDUFB4                           | 218226_s_at                   | NADH dehydrogenase (ubiquinone) 1 beta subcomplex, 4, 15kDa                              |
| COX6A2                           | 206353_at                     | cytochrome c oxidase subunit VIa polypeptide 2                                           |
| COX8A                            | 201119_s_at                   | cytochrome c oxidase subunit VIIIA (ubiquitous)                                          |
| PDHA1                            | 200980_s_at                   | pyruvate dehydrogenase (lipoamide) alpha 1                                               |
| MAP2K4                           | 203265_s_at                   | mitogen-activated protein kinase kinase 4                                                |
| NDUFS8                           | 203189_s_at                   | NADH dehydrogenase (ubiquinone) Fe-S protein 8, 23kDa (NADH-coenzyme Q reductase)        |
| BACE1                            | 224335_s_at                   | beta-site APP-cleaving enzyme 1                                                          |
| PARK2                            | 207058_s_at                   | parkinson protein 2, E3 ubiquitin protein ligase (parkin)                                |
| OGDH                             | 1554151_at                    | oxoglutarate (alpha-ketoglutarate) dehydrogenase (lipoamide)                             |
| <b>Integrin Signaling</b>        |                               |                                                                                          |
| ITGA4                            | 213416_at                     | integrin, alpha 4 (antigen CD49D, alpha 4 subunit of VLA-4 receptor)                     |
| PIK3CD                           | 203879_at                     | phosphoinositide-3-kinase, catalytic, delta polypeptide                                  |
| WIPF1                            | 202664_at                     | WAS/WASL interacting protein family, member 1                                            |
| NRAS                             | 202647_s_at                   | neuroblastoma RAS viral (v-ras) oncogene homolog                                         |
| PTEN                             | 211711_s_at                   | phosphatase and tensin homolog                                                           |
| PPP1CB                           | 201407_s_at                   | protein phosphatase 1, catalytic subunit, beta isozyme                                   |
| ACTR3                            | 213102_at                     | ARP3 actin-related protein 3 homolog (yeast)                                             |
| RAP1B                            | 200833_s_at                   | RAP1B, member of RAS oncogene family                                                     |
| PAK2                             | 1559052_s_at                  | p21 protein (Cdc42/Rac)-activated kinase 2                                               |
| RAP2A                            | 225585_at                     | RAP2A, member of RAS oncogene family                                                     |
| RALA                             | 224880_at                     | v-ral simian leukemia viral oncogene homolog A (ras related)                             |
| MAPK8                            | 229664_at                     | mitogen-activated protein kinase 8                                                       |
| ARHGEF7                          | 202547_s_at                   | Rho guanine nucleotide exchange factor (GEF) 7                                           |
| RAC1                             | 1567458_s_at                  | ras-related C3 botulinum toxin substrate 1 (rho family, small GTP binding protein Rac1)  |
| ARF4                             | 201097_s_at                   | ADP-ribosylation factor 4                                                                |
| SOS1                             | 212780_at                     | son of sevenless homolog 1 ( <i>Drosophila</i> )                                         |
| RHOQ                             | 212119_at                     | ras homolog gene family, member Q                                                        |
| PIK3R4                           | 212740_at                     | phosphoinositide-3-kinase, regulatory subunit 4                                          |
| ACTN2                            | 203864_s_at                   | actinin, alpha 2                                                                         |

|        |             |                                                             |
|--------|-------------|-------------------------------------------------------------|
| MAP2K4 | 203265_s_at | mitogen-activated protein kinase kinase 4                   |
| RHOJ   | 235131_at   | ras homolog gene family, member J                           |
| MAP2K2 | 213490_s_at | mitogen-activated protein kinase kinase 2                   |
| ACTN2  | 203863_at   | actinin, alpha 2                                            |
| CAPN1  | 200752_s_at | calpain 1, (mu/l) large subunit                             |
| CAPN3  | 211890_x_at | calpain 3, (p94)                                            |
| ATM    | 1553387_at  | ataxia telangiectasia mutated                               |
| GSK3B  | 242336_at   | glycogen synthase kinase 3 beta                             |
| GSK3B  | 242336_at   | glycogen synthase kinase 3 beta                             |
| PAK1   | 1565772_at  | p21 protein (Cdc42/Rac)-activated kinase 1                  |
| ITGB3  | 204627_s_at | integrin, beta 3 (platelet glycoprotein IIIa, antigen CD61) |

#### Ephrin Receptor Signaling

|        |              |                                                                                                       |
|--------|--------------|-------------------------------------------------------------------------------------------------------|
| ITGA4  | 213416_at    | integrin, alpha 4 (antigen CD49D, alpha 4 subunit of VLA-4 receptor)                                  |
| ATF2   | 205446_s_at  | activating transcription factor 2                                                                     |
| WIPF1  | 202664_at    | WAS/WASL interacting protein family, member 1                                                         |
| GNAL   | 206355_at    | guanine nucleotide binding protein (G protein), alpha activating activity polypeptide, olfactory type |
| NRAS   | 202647_s_at  | neuroblastoma RAS viral (v-ras) oncogene homolog                                                      |
| DOK1   | 216835_s_at  | docking protein 1, 62kDa (downstream of tyrosine kinase 1)                                            |
| CREB1  | 204313_s_at  | cAMP responsive element binding protein 1                                                             |
| GNA13  | 227539_at    | guanine nucleotide binding protein (G protein), alpha 13                                              |
| CXCL12 | 209687_at    | chemokine (C-X-C motif) ligand 12                                                                     |
| ACTR3  | 213102_at    | ARP3 actin-related protein 3 homolog (yeast)                                                          |
| PDGFC  | 218718_at    | platelet derived growth factor C                                                                      |
| RAP1B  | 200833_s_at  | RAP1B, member of RAS oncogene family                                                                  |
| PAK2   | 1559052_s_at | p21 protein (Cdc42/Rac)-activated kinase 2                                                            |
| MAP4K4 | 222547_at    | mitogen-activated protein kinase kinase kinase kinase 4                                               |
| GNG10  | 201921_at    | DNAJC25-GNG10 readthrough                                                                             |
| SDCBP  | 200958_s_at  | syndecan binding protein (syntenin)                                                                   |
| RASA1  | 210621_s_at  | RAS p21 protein activator (GTPase activating protein) 1                                               |
| RAC1   | 1567458_s_at | ras-related C3 botulinum toxin substrate 1 (rho family, small GTP binding protein Rac1)               |
| SOS1   | 212780_at    | son of sevenless homolog 1 (Drosophila)                                                               |
| GRINA  | 212090_at    | glutamate receptor, ionotropic, N-methyl D-aspartate-associated protein 1 (glutamate binding)         |
| GNAS   | 200981_x_at  | GNAS complex locus                                                                                    |
| MAP2K2 | 213490_s_at  | mitogen-activated protein kinase kinase 2                                                             |
| EFNB2  | 202668_at    | ephrin-B2                                                                                             |
| PAK1   | 1565772_at   | p21 protein (Cdc42/Rac)-activated kinase 1                                                            |

#### HMGB1 Signaling

|        |              |                                                                                         |
|--------|--------------|-----------------------------------------------------------------------------------------|
| PIK3CD | 203879_at    | phosphoinositide-3-kinase, catalytic, delta polypeptide                                 |
| IL1R1  | 202948_at    | interleukin 1 receptor, type I                                                          |
| NRAS   | 202647_s_at  | neuroblastoma RAS viral (v-ras) oncogene homolog                                        |
| KAT2B  | 239585_at    | K(lysine) acetyltransferase 2B                                                          |
| MAPK8  | 229664_at    | mitogen-activated protein kinase 8                                                      |
| RAC1   | 1567458_s_at | ras-related C3 botulinum toxin substrate 1 (rho family, small GTP binding protein Rac1) |
| MYST2  | 200049_at    | MYST histone acetyltransferase 2                                                        |
| HMGB1  | 200679_x_at  | high-mobility group box 1                                                               |
| RHOQ   | 212119_at    | ras homolog gene family, member Q                                                       |

|        |             |                                                 |
|--------|-------------|-------------------------------------------------|
| PIK3R4 | 212740_at   | phosphoinositide-3-kinase, regulatory subunit 4 |
| MAP2K4 | 203265_s_at | mitogen-activated protein kinase kinase 4       |
| RHOJ   | 235131_at   | ras homolog gene family, member J               |
| MAP2K2 | 213490_s_at | mitogen-activated protein kinase kinase 2       |
| ATM    | 1553387_at  | ataxia telangiectasia mutated                   |
| ELK1   | 203617_x_at | ELK1, member of ETS oncogene family             |
| MAP2K7 | 216206_x_at | mitogen-activated protein kinase kinase 7       |

#### Rac Signaling

|        |              |                                                                                         |
|--------|--------------|-----------------------------------------------------------------------------------------|
| ITGA4  | 213416_at    | integrin, alpha 4 (antigen CD49D, alpha 4 subunit of VLA-4 receptor)                    |
| PIK3CD | 203879_at    | phosphoinositide-3-kinase, catalytic, delta polypeptide                                 |
| WASF1  | 204165_at    | WAS protein family, member 1                                                            |
| NRAS   | 202647_s_at  | neuroblastoma RAS viral (v-ras) oncogene homolog                                        |
| ACTR3  | 213102_at    | ARP3 actin-related protein 3 homolog (yeast)                                            |
| PAK2   | 1559052_s_at | p21 protein (Cdc42/Rac)-activated kinase 2                                              |
| MAPK8  | 229664_at    | mitogen-activated protein kinase 8                                                      |
| RAC1   | 1567458_s_at | ras-related C3 botulinum toxin substrate 1 (rho family, small GTP binding protein Rac1) |
| ANK1   | 207087_x_at  | ankyrin 1, erythrocytic                                                                 |
| PIK3R4 | 212740_at    | phosphoinositide-3-kinase, regulatory subunit 4                                         |
| MAP2K4 | 203265_s_at  | mitogen-activated protein kinase kinase 4                                               |
| MAP2K2 | 213490_s_at  | mitogen-activated protein kinase kinase 2                                               |
| ATM    | 1553387_at   | ataxia telangiectasia mutated                                                           |
| ELK1   | 203617_x_at  | ELK1, member of ETS oncogene family                                                     |
| MAP2K7 | 216206_x_at  | mitogen-activated protein kinase kinase 7                                               |
| CD44   | 216062_at    | CD44 molecule (Indian blood group)                                                      |
| PAK1   | 1565772_at   | p21 protein (Cdc42/Rac)-activated kinase 1                                              |
