# Supplementary material for: Molecular signatures of differential responses to exercise trainings during rehabilitation
Source: PubMed Central journal article supplement (PMC5568829; doi:10.15761/bgg.1000127), 2017-04-10
Supplement: NIHMS888767-supplement-Table_S3.pdf [file NIHMS888767-supplement-Table_S3.pdf]

Table S3 A cluster of genes identified by hierarchical clustering to be differentially regulated in the high responders

| Affymetrix<br>accession # | Gene description                                                                         | Fold change        |                | Fold change              |                | Fold change              |                |
|---------------------------|------------------------------------------------------------------------------------------|--------------------|----------------|--------------------------|----------------|--------------------------|----------------|
|                           |                                                                                          | Immobilization     |                | Rehabilitation (3 weeks) |                | Rehabilitation (6 weeks) |                |
|                           |                                                                                          | High<br>Responders | Low Responders | High<br>Responders       | Low Responders | High<br>Responders       | Low Responders |
| 221518_s_at               | 601659921R1 NIH_MGC_71 Homo<br>sapiens cDNA clone<br>IMAGE:3905741 3', mRNA<br>sequence. | NA                 | NA             | -1.1                     | NA             | NA                       | NA             |
| 225783_at                 | 602083944F1 NIH_MGC_83 Homo<br>sapiens cDNA clone<br>IMAGE:4248227 5', mRNA<br>sequence. | NA                 | NA             | -1.2                     | NA             | NA                       | NA             |

|             |                                                |      |     |      |    |      |    |
|-------------|------------------------------------------------|------|-----|------|----|------|----|
| 241959_at   | anaphase-promoting complex<br>subunit 10       | NA   | 1.3 | NA   | NA | NA   | NA |
| 206536_s_at | baculoviral IAP repeat-containing 4            | NA   | 1.3 | NA   | NA | NA   | NA |
| 202387_at   | BCL2-associated athanogene                     | -1.3 | NA  | -1.2 | NA | -1.3 | NA |
| 220372_at   | chromosome 21 open reading frame<br>55         | -1.4 | NA  | -1.4 | NA | -1.3 | NA |
| 209283_at   | crystallin, alpha B                            | -1.2 | NA  | -1.2 | NA | NA   | NA |
| 203079_s_at | cullin 2                                       | -1.1 | NA  | -1.2 | NA | -1.1 | NA |
| 202500_at   | DnaJ (Hsp40) homolog, subfamily B,<br>member 2 | NA   | NA  | -1.2 | NA | NA   | NA |
| 203811_s_at | DnaJ (Hsp40) homolog, subfamily B,<br>member 4 | NA   | NA  | -1.4 | NA | NA   | NA |
| 209015_s_at | DnaJ (Hsp40) homolog, subfamily B,<br>member 6 | NA   | NA  | -1.4 | NA | -1.2 | NA |

|              |                                             |      |     |      |    |    |    |
|--------------|---------------------------------------------|------|-----|------|----|----|----|
| 237284_at    | DnaJ (Hsp40) homolog, subfamily B, member 8 | NA   | 1.5 | NA   | NA | NA | NA |
| 202842_s_at  | DnaJ (Hsp40) homolog, subfamily B, member 9 | NA   | NA  | -1.2 | NA | NA | NA |
| 218409_s_at  | DnaJ (Hsp40) homolog, subfamily C, member 1 | -1.3 | NA  | NA   | NA | NA | NA |
| 212490_at    | DnaJ (Hsp40) homolog, subfamily C, member 8 | NA   | NA  | -1.2 | NA | NA | NA |
| 1554451_s_at | DnaJ protein                                | -1.5 | NA  | -1.8 | NA | NA | NA |
| 206976_s_at  | heat shock 105kDa/110kDa protein 1          | NA   | NA  | -1.3 | NA | NA | NA |
| 205133_s_at  | heat shock 10kDa protein 1 (chaperonin 10)  | NA   | NA  | -1.3 | NA | NA | NA |
| 208687_x_at  | heat shock 70kDa protein 8                  | NA   | NA  | -1.4 | NA | NA | NA |

|             |                                                                                                                                                  |      |     |      |      |      |    |
|-------------|--------------------------------------------------------------------------------------------------------------------------------------------------|------|-----|------|------|------|----|
| 200690_at   | heat shock 70kDa protein 9B<br>(mortalin-2)                                                                                                      | NA   | NA  | -1.4 | NA   | -1.2 | NA |
| 210211_s_at | heat shock 90kDa protein 1, alpha                                                                                                                | NA   | NA  | -1.2 | NA   | NA   | NA |
| 200064_at   | heat shock 90kDa protein 1, beta                                                                                                                 | NA   | NA  | -1.2 | -1.1 | -1.1 | NA |
| 224309_s_at | Homo sapiens HDCMD34P mRNA,<br>complete cds.                                                                                                     | NA   | 1.2 | -1.1 | NA   | -1.2 | NA |
| 200806_s_at | Homo sapiens transcribed sequence<br>with strong similarity to protein<br>pir:A32800 (H.sapiens) A32800<br>chaperonin GroEL precursor -<br>human | NA   | NA  | -1.3 | NA   | NA   | NA |
| 219861_at   | hypothetical protein FLJ10634                                                                                                                    | -1.4 | NA  | NA   | NA   | NA   | NA |
| 223721_s_at | J domain containing protein 1                                                                                                                    | -1.4 | NA  | NA   | NA   | NA   | NA |
| 237465_at   | KIAA1350 protein                                                                                                                                 | NA   | 1.9 | NA   | NA   | NA   | NA |

|             |                                                                |      |    |      |      |      |    |
|-------------|----------------------------------------------------------------|------|----|------|------|------|----|
| 204219_s_at | proteasome (prosome, macropain)<br>26S subunit, ATPase, 1      | NA   | NA | -1.2 | NA   | NA   | NA |
| 201067_at   | proteasome (prosome, macropain)<br>26S subunit, ATPase, 2      | NA   | NA | -1.2 | -1.1 | -1.1 | NA |
| 208777_s_at | proteasome (prosome, macropain)<br>26S subunit, non-ATPase, 11 | NA   | NA | -1.3 | NA   | NA   | NA |
| 202352_s_at | proteasome (prosome, macropain)<br>26S subunit, non-ATPase, 12 | NA   | NA | -1.2 | NA   | NA   | NA |
| 201532_at   | proteasome (prosome, macropain)<br>subunit, alpha type, 3      | NA   | NA | -1.2 | NA   | NA   | NA |
| 201274_at   | proteasome (prosome, macropain)<br>subunit, alpha type, 5      | -1.2 | NA | -1.2 | NA   | NA   | NA |
| 200876_s_at | proteasome (prosome, macropain)<br>subunit, beta type, 1       | -1.1 | NA | -1.1 | NA   | -1.1 | NA |

|             |                                                                                                                                                                                                           |      |     |      |     |      |     |
|-------------|-----------------------------------------------------------------------------------------------------------------------------------------------------------------------------------------------------------|------|-----|------|-----|------|-----|
| 211609_x_at | Subunit of the 26S protease that binds and presumably selects ubiquitin-conjugates for destruction; Subunit 5a of the 26S protease regulatory complex; Human 26S protease subunit S5a mRNA, complete cds. | NA   | NA  | -1.2 | NA  | -1.2 | NA  |
| 203235_at   | thimet oligopeptidase 1                                                                                                                                                                                   | -1.4 | NA  | -1.3 | NA  | NA   | NA  |
| 227788_at   | ubiquitin specific protease 13 (isopeptidase T-3)                                                                                                                                                         | NA   | NA  | -1.2 | NA  | NA   | NA  |
| 228822_s_at | ubiquitin specific protease 16                                                                                                                                                                            | NA   | 1.2 | NA   | NA  | NA   | 1.2 |
| 212381_at   | ubiquitin specific protease 24                                                                                                                                                                            | NA   | NA  | -1.3 | NA  | NA   | NA  |
| 209096_at   | ubiquitin-conjugating enzyme E2 variant 2                                                                                                                                                                 | NA   | 1.2 | NA   | 1.1 | NA   | 1.1 |

|             |                                                               |      |     |      |    |      |    |
|-------------|---------------------------------------------------------------|------|-----|------|----|------|----|
| 201898_s_at | ubiquitin-conjugating enzyme E2A<br>(RAD6 homolog)            | -1.2 | NA  | NA   | NA | -1.1 | NA |
| 200668_s_at | ubiquitin-conjugating enzyme E2D 3<br>(UBC4/5 homolog, yeast) | -1.1 | NA  | -1.2 | NA | NA   | NA |
| 200676_s_at | ubiquitin-conjugating enzyme E2L 3                            | NA   | NA  | -1.3 | NA | NA   | NA |
| 212751_at   | ubiquitin-conjugating enzyme E2N<br>(UBC13 homolog, yeast)    | -1.1 | 1.1 | NA   | NA | NA   | NA |

---
